# Supplementary material for: Metabolomics analysis identifies metabolites associated with systemic acquired resistance in Arabidopsis
Source: PeerJ. 2020 Sep 30;8:e10047. doi: 10.7717/peerj.10047 (PMC7532762; doi:10.7717/peerj.10047)
Supplement: Table S1 [file peerj-08-10047-s001.xlsx]

## Sheet: Sheet1
Name	Formula	Molecular Weight	RT [min]	Area (Max.)	LL-CK-1	LL-CK-2	LL-CK-3	LL-CK-4	LL-CK-5	LL-CK-6	LL-Avr-1	LL-Avr-2	LL-Avr-3	LL-Avr-4	LL-Avr-5	LL-Avr-6	LL-Vir-1	LL-Vir-2	LL-Vir-3	LL-Vir-4	LL-Vir-5	LL-Vir-6	DL-CK-1	DL-CK-2	DL-CK-3	DL-CK-4	DL-CK-5	DL-CK-6	DL-Avr-1	DL-Avr-2	DL-Avr-3	DL-Avr-4	DL-Avr-5	DL-Avr-6	DL-Vir-1	DL-Vir-2	DL-Vir-3	DL-Vir-4	DL-Vir-5	DL-Vir-6	QC-1	QC-2	QC-3	QC-4	QC-5	QC-6
Sinapoylspermine	C21 H36 N4 O4	408.272	7.939	6.45122e+07	7.33989e+06	6.52468e+06	6.62894e+06	6.80703e+06	7.32572e+06	6.77921e+06	7.59896e+07	6.78452e+07	7.76218e+07	8.12228e+07	8.34191e+07	8.13281e+07	6.16906e+07	6.09031e+07	5.72023e+07	5.65173e+07	5.98712e+07	6.03577e+07	6.17349e+06	5.72368e+06	6.42994e+06	6.01522e+06	6.04557e+06	6.10259e+06	1.33123e+07	1.38703e+07	1.39922e+07	1.4547e+07	1.41029e+07	1.461e+07	4.71643e+07	4.76493e+07	5.16449e+07	4.6328e+07	4.55681e+07	4.65976e+07	3.64115e+07	3.29425e+07	3.74049e+07	3.39546e+07	3.37275e+07	3.60352e+07
(8E)-2-Amino-8-octadecene-1,3,4-triol	C18 H37 N O3	315.277	7.665	416366	467123	480797	482590	484807	464460	468367	280435	269482	271078	294117	277582	273609	214653	208415	210229	196179	184804	195287	602824	620223	544977	504344	527710	442339	534043	462327	613892	489471	518298	485167	470440	497916	459591	477112	449953	450669	352382	329627	427691	358149	362578	322954
(9S,13S)-12-Oxophytodienoic acid	C18 H28 O3	292.203	9.506	2.08706e+07	6.12037e+06	6.43973e+06	6.67448e+06	6.82208e+06	6.58382e+06	6.34231e+06	1.29766e+06	1.3712e+06	1.24305e+06	1.3276e+06	1.26905e+06	1.32923e+06	2.09488e+07	2.03805e+07	2.06065e+07	2.14691e+07	2.2078e+07	2.13268e+07	7.86529e+06	8.02475e+06	8.09106e+06	7.66286e+06	8.34197e+06	8.16979e+06	5.75859e+06	6.33894e+06	5.66631e+06	5.55495e+06	5.50203e+06	5.42182e+06	3.6068e+06	3.31465e+06	3.43668e+06	3.49998e+06	3.59099e+06	3.4869e+06	7.92007e+06	7.32391e+06	7.24053e+06	7.87225e+06	7.67572e+06	7.45104e+06
(9Z,11E,13S,15Z)-13-Hydroperoxy-9,11,15-octadecatrienoic acid	C18 H30 O4	310.214	8.7	1.8018e+06	497487	379621	422634	534580	438487	563065	129630	122293	127085	168343	173405	143717	1.87699e+06	1.84217e+06	1.83354e+06	1.77165e+06	1.85915e+06	1.88575e+06	648335	753954	666717	700846	792341	820435	479915	482412	499678	497859	509816	533652	332342	357446	401185	370669	359903	365238	596548	565607	581579	565761	648933	541782
(E)-3,4,5-Trimethoxycinnamic acid	C12 H14 O5	238.084	5.459	262605	263297	266546	254601	273338	260013	273606	260232	314241	275657	294387	282917	283021	165936	192032	187467	191590	176970	199780	191266	191189	204003	223275	237292	237823	249092	258223	267047	251069	257097	290031	266841	260606	269170	269197	286786	281571	234671	204719	204937	207460	208135	229952
(E)-Ferulic acid	C10 H10 O4	194.058	4.996	335748	369968	402170	420467	422741	405960	379105	190240	250779	195760	192421	186826	174499	165642	207043	134317	136269	127180	135832	332006	367349	379785	417018	403305	436559	407643	412966	335352	402179	367510	362870	369468	288984	258524	308693	371972	324630	240578	172138	190683	304625	212940	193838
(E)-p-coumaric acid	C9 H8 O3	164.047	1.209	2.15675e+07	2.45254e+06	2.4999e+06	2.47912e+06	2.32807e+06	2.61837e+06	2.54603e+06	2.83415e+06	2.85577e+06	2.52749e+06	2.87541e+06	2.73542e+06	2.80292e+06	1.93006e+07	2.11701e+07	2.11624e+07	2.22615e+07	2.02984e+07	2.08216e+07	2.88938e+06	2.42058e+06	2.6478e+06	2.58581e+06	2.51353e+06	2.60684e+06	4.48739e+06	4.52029e+06	4.37684e+06	4.50341e+06	4.49005e+06	4.58957e+06	3.53188e+06	3.13355e+06	3.36961e+06	3.3643e+06	3.39327e+06	3.4277e+06	6.90677e+06	6.90956e+06	6.33103e+06	6.64691e+06	6.72348e+06	6.83097e+06
(S)-2-ureidoglycine	C3 H7 N3 O3	133.049	0.948	510344	296704	236446	231105	261086	299788	267231	192801	229093	171328	176424	185033	200444	306005	309958	444639	485505	340194	326018	186900	183230	210736	206215	207766	206971	245474	280782	238914	230371	254189	298060	228932	229172	243583	235607	221248	258839	271473	256483	258269	177230	217102	298677
(Z)-dehydrocyclopeptine	C17 H14 N2 O2	278.105	7.732	62050.1	49777.3	47307	49267.1	49738.1	50748.6	46634.5	16023.1	15527.8	12381.7	15677.8	13156.2	15450.9	16277.3	21654.4	22194.9	16140.1	18068.6	19024.9	68254.2	72319.2	72685.9	63130.7	64468.2	72721.9	80371.9	69240	71136.2	78150.9	70616.1	76091.3	53841.5	48577.6	52348.6	53259.7	44653.9	46125.9	37231.3	38312.7	36366	31186.7	37630.2	37881.3
alpha.-Aminoadipic acid	C6 H11 N O4	161.069	0.901	6.03886e+06	1.83091e+06	1.65243e+06	1.52264e+06	1.91657e+06	1.88078e+06	1.558e+06	2.30627e+06	2.61576e+06	2.30874e+06	1.95628e+06	2.13444e+06	2.32682e+06	6.36612e+06	6.11345e+06	5.62433e+06	5.79761e+06	6.03767e+06	5.58186e+06	1.12248e+06	1.09548e+06	1.08148e+06	1.24004e+06	1.21205e+06	1.16405e+06	1.55564e+06	1.57514e+06	1.36675e+06	1.25035e+06	1.53109e+06	1.50391e+06	819713	774194	961068	735425	704743	827336	114390	114186	118968	250365	189648	114157
1-{[5-Methyl-2-(trifluoromethyl)-3-furyl]carbonyl}-4-piperidinecarboxylic acid	C6 H11 O6 P	210.03	1.247	1.84427e+06	2.33898e+06	2.34891e+06	1.94372e+06	2.4034e+06	2.46198e+06	2.31477e+06	1.13014e+06	1.14647e+06	1.32694e+06	1.16451e+06	1.12186e+06	1.21943e+06	1.24677e+06	1.20592e+06	1.16863e+06	1.28619e+06	1.26138e+06	1.1556e+06	2.41685e+06	2.3192e+06	2.05063e+06	2.2891e+06	2.38119e+06	2.35935e+06	1.83704e+06	1.79203e+06	1.6529e+06	1.70654e+06	1.60726e+06	1.71214e+06	1.35547e+06	1.37513e+06	1.34445e+06	1.10955e+06	1.20163e+06	1.2442e+06	1.3608e+06	1.28337e+06	1.24846e+06	1.30837e+06	1.30029e+06	1.31566e+06
2-({2-[4-(4-Fluorophenyl)piperazino]-2-oxoethyl}sulfanyl)acetic acid	C5 H9 N O S	131.04	1.527	4.11968e+06	3.59847e+06	4.41287e+06	4.34188e+06	4.01202e+06	3.66808e+06	3.95417e+06	2.45703e+06	2.15286e+06	2.34504e+06	2.18763e+06	2.5855e+06	2.24557e+06	3.28636e+06	2.86463e+06	2.99705e+06	2.86007e+06	3.30018e+06	2.9372e+06	5.08913e+06	5.12596e+06	4.71447e+06	4.44322e+06	4.81806e+06	5.05248e+06	4.85873e+06	4.20348e+06	4.52449e+06	5.28656e+06	4.89421e+06	4.54176e+06	3.80399e+06	3.80619e+06	3.63992e+06	3.98414e+06	3.51239e+06	4.21453e+06	3.25621e+06	2.95693e+06	2.80946e+06	3.06797e+06	3.17759e+06	3.01456e+06
5,5,5-Trifluoronorvaline	C7 H8 N9 O6 P	345.035	3.129	275233	1460.5	197710	207603	1390.68	1386.43	213081	107011	1392.61	1369.75	106463	102991	1352.78	159703	159827	1009.99	1015.45	160965	161314	2523.17	366400	355094	1152.68	4156.99	378348	1122.36	1206.62	307426	305718	314263	1959.55	202361	194704	1071.33	218583	210137	218834	203928	1238.8	1109.21	188023	204730	6481.41
5-Hydroxyindole-3-acetic acid	C10 H17 N10 O P	324.131	1.404	529552	355034	384181	418041	354944	345859	359181	532344	455690	479925	455476	461194	464508	489027	473531	552685	449384	523123	488556	148059	174804	181058	166438	156424	223596	152140	187937	187684	196556	221478	174621	178115	168892	177201	133232	129731	139578	273219	273679	262980	294644	254937	274188
Choline	C5H14NO	103.996	0.608	9.64774e+06	8.31571e+06	1.45272e+07	1.55565e+07	9.23381e+06	9.24084e+06	1.4051e+07	9.63343e+06	5.70356e+06	6.67639e+06	8.55248e+06	8.35397e+06	5.88909e+06	8.84243e+06	8.70806e+06	5.55378e+06	6.40325e+06	8.89109e+06	7.8468e+06	6.65635e+06	9.57219e+06	9.77102e+06	6.72331e+06	6.74456e+06	9.85943e+06	3.18118e+06	3.53569e+06	5.18458e+06	6.09449e+06	5.36086e+06	3.55002e+06	5.90322e+06	7.02953e+06	3.87167e+06	7.07141e+06	6.06589e+06	5.46102e+06	6.4621e+06	6.04534e+06	5.85666e+06	7.35742e+06	7.55715e+06	5.12246e+06
L-Glutathione oxidized	C23 H30 N3 O4 P3 S	537.119	2.16	239979	152501	150454	148433	149253	148339	150350	191369	186487	167031	194393	179177	188948	227762	225519	212225	208883	249273	228564	201002	230208	236930	212886	212684	242924	231924	258780	260077	246458	237669	267319	128156	143839	162154	130424	128718	133917	172179	169773	170709	164514	175640	167170
O1-Cinnamoyl-3-[3,5-bis(trifluoromethyl)phenyl]prop-2-enehydroximamide	C34 H34 N2 O12 P2	724.159	5.317	4.6109e+06	3.91518e+06	4.04661e+06	3.90657e+06	3.87517e+06	3.86758e+06	3.97425e+06	742653	640874	731494	637908	684916	643178	3.17449e+06	3.19348e+06	3.22999e+06	3.80368e+06	2.73087e+06	3.3185e+06	5.45698e+06	5.46667e+06	6.22232e+06	5.67929e+06	5.93163e+06	5.84798e+06	4.05566e+06	3.94581e+06	3.93859e+06	4.20804e+06	4.67241e+06	3.90954e+06	3.86654e+06	3.95122e+06	3.72229e+06	3.79778e+06	3.82351e+06	3.82805e+06	3.37622e+06	3.11539e+06	3.18456e+06	3.23545e+06	3.17671e+06	3.27348e+06
Sinapinic acid	C34 H27 N2 O5 P	574.167	5.749	2.35263e+06	1.60686e+06	1.95959e+06	1.72224e+06	1.45222e+06	1.74816e+06	1.85236e+06	3.11727e+06	2.9057e+06	2.56612e+06	2.80689e+06	2.61922e+06	2.50263e+06	456951	398069	373828	407756	371241	432416	1.06668e+06	1.38391e+06	1.37862e+06	1.57273e+06	1.235e+06	1.28565e+06	2.61526e+06	2.38672e+06	2.45139e+06	2.82447e+06	2.22385e+06	2.19216e+06	1.38134e+06	1.66757e+06	1.16847e+06	1.1049e+06	1.38925e+06	1.11306e+06	1.44828e+06	1.33593e+06	1.02856e+06	1.47125e+06	984474	1.49966e+06
1,2-bis-O-sinapoyl β-D-glucoside	C28 H32 O14	592.178	5.75	2.48687e+06	1.72303e+06	2.05428e+06	1.81406e+06	1.51274e+06	1.81438e+06	1.9071e+06	3.4696e+06	3.23117e+06	2.85395e+06	3.08054e+06	2.6877e+06	2.81141e+06	484587	422702	394061	431575	394999	453752	1.26347e+06	1.48933e+06	1.48182e+06	1.67924e+06	1.32608e+06	1.40464e+06	2.83254e+06	2.48048e+06	2.54223e+06	2.93186e+06	2.33033e+06	2.3808e+06	1.41942e+06	1.69268e+06	1.30383e+06	1.1351e+06	1.41032e+06	1.14158e+06	1.41836e+06	1.4743e+06	1.10969e+06	1.57887e+06	1.13153e+06	1.48212e+06
14,18-Dihydroxy-12-oxo-9,13,15-octadecatrienoic acid	C18 H28 O5	324.193	8.536	835384	63339	56142.3	49096.4	54559.8	48540.4	52424.9	32043.8	23597.6	39096.9	30202.3	23618.4	36762.2	883696	797319	801225	866937	678450	795774	104083	107353	108201	93001.1	94738.5	104446	77192.1	66805	75906.3	68037.5	70142.6	71985.2	61653.2	64756.1	58315.9	64897	66168.1	57534	166272	196050	173713	165074	197527	165568
16-Heptadecyne-1,2,4-triol	C17 H32 O3	306.219	13.915	1.46018e+06	312557	307929	227436	259896	252992	300173	1.47457e+06	1.44364e+06	1.50024e+06	1.27601e+06	1.54537e+06	1.40443e+06	69437.4	106148	64644.8	99877.4	81649.1	61403.2	331253	344507	369808	279503	296970	259239	580884	554817	609684	531698	493402	496329	522407	518763	408989	447773	529920	485930	502870	488081	555300	613798	444379	486740
16-hydroxyphorbol 13-decanoate 12-palmitate	C38 H60 O9	660.422	9.935	3.9912e+06	3.20693e+06	3.02586e+06	3.06674e+06	3.31602e+06	3.42657e+06	3.18475e+06	2.5972e+06	2.36294e+06	2.58128e+06	2.5453e+06	2.41705e+06	2.49804e+06	2.57211e+06	2.45525e+06	2.66743e+06	2.73083e+06	2.51809e+06	2.99886e+06	4.77324e+06	5.14523e+06	4.61936e+06	4.72924e+06	4.81298e+06	4.96125e+06	4.49124e+06	4.48141e+06	4.138e+06	4.59424e+06	4.49656e+06	4.65176e+06	4.26022e+06	4.15227e+06	4.05437e+06	3.82237e+06	4.31184e+06	4.31828e+06	3.13309e+06	2.88091e+06	2.97018e+06	3.07343e+06	3.02491e+06	2.975e+06
1-alpha-linolenoyl-sn-glycerol	C21 H36 O4	352.261	11.646	860404	1.07937e+06	1.11025e+06	791240	991523	788103	874320	1.12566e+06	990807	912139	972557	1.16803e+06	846676	455707	474084	355802	338805	358191	430606	478126	469028	375640	438711	509815	407006	1.00914e+06	1.03308e+06	1.11225e+06	1.0232e+06	1.0434e+06	837547	800394	956302	806145	849947	1.00754e+06	998796	726880	571330	697631	569608	573831	637055
1D-myo-Inositol 1,2-cyclic phosphate	C6 H11 O8 P	242.019	1.341	2.22724e+06	2.75335e+06	2.51271e+06	2.47796e+06	2.69315e+06	2.65612e+06	2.73299e+06	2.267e+06	2.28543e+06	2.38656e+06	2.46313e+06	2.29899e+06	2.29414e+06	1.41523e+06	1.35729e+06	1.32968e+06	1.39287e+06	1.42794e+06	1.49387e+06	2.11527e+06	1.92806e+06	2.05715e+06	2.01736e+06	2.26828e+06	2.33882e+06	2.78246e+06	2.49615e+06	2.42681e+06	2.33719e+06	2.35531e+06	2.68089e+06	1.86923e+06	2.04599e+06	1.99797e+06	2.04002e+06	2.1417e+06	2.03809e+06	2.11539e+06	1.64232e+06	1.76886e+06	1.79347e+06	1.80695e+06	1.93946e+06
1-Hexadecanoylpyrrolidine	C20 H39 N O	309.303	14.597	532029	138097	178095	194075	142237	143201	150428	485547	502340	511649	442374	480702	521343	187956	221166	218695	222552	216368	212273	269798	295585	249771	242205	214957	209721	195533	174504	194592	158305	167271	182742	94475.7	110752	138450	96142.4	111434	110628	218790	234652	224894	223267	217009	223404
1H-Indol-3-yl beta-D-glucopyranosiduronic acid	C14 H15 N O7	309.084	5.154	105516	2551.19	2420.89	2137.71	2018.29	2305.72	2236.29	2567.81	1938.83	2125.91	1941.34	2262.77	2219.78	101516	107968	104274	118980	105685	107715	1836.7	2804.37	1855.32	1916.97	1547.24	5756.12	7705.38	7915.23	2043.43	8571.12	4419.81	9555.3	1782.83	1736.81	1920.64	2502.42	1625.22	1743.35	16544.1	20508.3	23164.2	19008.5	20524.9	22026.7
1-O-(indol-3-ylacetyl)-beta-D-glucose	C16 H19 N O7	337.115	5.028	323093	115841	113632	105838	95999	103329	104910	279980	279109	248385	272690	261463	260582	274783	344775	284725	276139	333404	268147	24857.6	31905.7	27107.8	33473.4	30830.8	35541.7	55336.8	52491	54157.3	50550.6	52021	47981.2	21739.1	28822.2	28703.8	26185.4	26833.6	29828.7	104115	134764	116810	127899	109360	117343
1-O-sinapoyl-beta-D-glucose	C17 H22 O10	386.121	4.892	1.53004e+06	1.36913e+06	1.50373e+06	1.55969e+06	1.6404e+06	1.56399e+06	1.43298e+06	1.15131e+06	1.0718e+06	992314	1.28901e+06	903880	1.28262e+06	1.20101e+06	1.06411e+06	1.09505e+06	1.32366e+06	1.53513e+06	1.01241e+06	1.74725e+06	1.99042e+06	1.88457e+06	2.10545e+06	1.81993e+06	2.24903e+06	1.08704e+06	1.58294e+06	1.68437e+06	1.52964e+06	1.92271e+06	1.89033e+06	1.64808e+06	1.69773e+06	1.59574e+06	1.28471e+06	1.55319e+06	1.21665e+06	1.09435e+06	941335	992149	1.37878e+06	915746	1.00456e+06
2-(3,4-Dimethoxyphenyl)-N-(2-piperidinophenyl)acetamide	C21 H26 N2 O3	354.195	14.126	395506	355248	387964	368181	391535	399367	379193	325748	333613	371709	346524	363158	289059	411594	372736	345451	410793	402218	373104	233177	265841	261114	286991	244447	301836	203738	211702	224896	220947	247040	249038	247654	243718	256010	235134	226309	240485	290272	273659	272998	258158	290812	277429
2,3-Diacetoxyursa-12,18-dien-28-oic acid	C34 H50 O6	554.36	10.37	634017	512207	495820	526092	501480	563689	591583	665459	621594	612315	616510	632720	650608	205444	247916	223125	224100	220135	220218	983532	973835	923122	862944	1.005e+06	942418	663274	546403	600442	638214	590981	610054	740431	717613	580526	633019	663454	601655	455988	499535	509143	527860	505857	439059
2,3-Dimethoxy-5-methyl-6-(3-methyl-2-buten-1-yl)-1,4-benzenediol	C14 H20 O4	252.136	5.673	253805	217729	215632	214552	201646	190933	192671	81852.1	94580.1	67326.2	86271.6	92677.3	85708.2	175242	177233	164145	236610	172827	183841	331396	322474	327413	303313	324071	329426	281109	258084	257334	278246	276334	295294	279995	309791	266658	287128	279129	309707	195942	211153	171632	179330	210360	191324
2,4-dihydroxyheptadec-16-enyl acetate	C19 H36 O4	328.261	10.206	1.61516e+06	1.74865e+06	1.88746e+06	1.90305e+06	1.92602e+06	1.88697e+06	1.83104e+06	458646	470455	455304	491234	457285	524724	210961	211397	229899	236513	213514	211124	2.06727e+06	2.0167e+06	1.9337e+06	1.83818e+06	2.00192e+06	1.84607e+06	2.06847e+06	2.09332e+06	2.0909e+06	2.14449e+06	1.99087e+06	2.10966e+06	1.40169e+06	1.40579e+06	1.3543e+06	1.47307e+06	1.37617e+06	1.43027e+06	1.1186e+06	1.25635e+06	1.10795e+06	1.20516e+06	1.15389e+06	1.14011e+06
2,4-dihydroxyheptadec-16-ynyl acetate	C19 H34 O4	326.245	9.428	1.23944e+06	1.2036e+06	1.20771e+06	1.23988e+06	1.20762e+06	1.25361e+06	1.23342e+06	286802	293563	291094	274423	263463	282543	116664	122447	113187	120112	128643	107032	1.13254e+06	1.10604e+06	1.04723e+06	1.09545e+06	1.01218e+06	1.13288e+06	1.54456e+06	1.5696e+06	1.52556e+06	1.61041e+06	1.49349e+06	1.55717e+06	1.27646e+06	1.18789e+06	1.22057e+06	1.29406e+06	1.34462e+06	1.31824e+06	830490	735352	787935	765980	792153	787234
2,6-di-tert-butyl-4-ethylphenol	C16 H26 O	234.198	9.428	866786	800202	937448	828223	882205	899765	838656	269756	240483	232737	244734	251258	217853	113514	106687	84608.3	80470.9	96425.3	91892.5	780902	783966	729786	780377	740170	817864	1.13156e+06	1.13303e+06	1.06151e+06	1.09309e+06	1.06556e+06	1.12213e+06	908301	877160	910511	904118	894413	872653	591002	526329	576118	579414	544641	569801
2-[(2-Amino-2-carboxyethyl)sulfanyl]succinic acid	C7 H11 N O6 S	237.03	1.1	218052	122315	125223	131369	109129	110631	146056	173760	204525	224561	199938	200339	190778	225864	193599	201969	197419	232209	230285	92892.9	116454	119260	109310	122812	109753	116311	129530	100209	108760	108182	113178	150138	171331	144506	170146	143503	169085	132641	121240	100826	184311	130732	117292
2′-Hydroxy-4,4′,6′-trimethoxychalcone	C18 H18 O5	314.115	6.843	3.31748e+06	622603	596203	631842	585201	638225	625068	3.2581e+06	3.12656e+06	3.10635e+06	3.14817e+06	3.1336e+06	3.26599e+06	3.34854e+06	3.25444e+06	3.0393e+06	3.19319e+06	3.29403e+06	3.12048e+06	440939	406576	419882	425700	463392	486644	726751	762100	772100	835266	778125	765431	2.07292e+06	2.05046e+06	2.03295e+06	2.02586e+06	2.06736e+06	2.23297e+06	1.76778e+06	1.7023e+06	1.7247e+06	1.54008e+06	1.83552e+06	1.69631e+06
2-Amino-1,3,4-octadecanetriol	C18 H39 N O3	317.292	6.995	2.94347e+06	4.70997e+06	4.74111e+06	4.70753e+06	4.13231e+06	4.55581e+06	4.54466e+06	501191	515025	498610	484872	486438	523571	2.51225e+06	2.70504e+06	2.7005e+06	2.66998e+06	2.75987e+06	2.73746e+06	706196	707650	632424	641141	629392	678033	495805	462213	483066	482611	446176	434078	617104	567206	584798	569410	592333	608706	1.53458e+06	1.31025e+06	1.34987e+06	1.37939e+06	1.47539e+06	1.40522e+06
2-Indolylformic acid	C9 H7 N O2	161.048	5.117	4.15426e+06	604061	764944	665047	716447	675806	675113	695944	673956	626120	703637	700122	668732	3.42413e+06	3.1333e+06	3.37019e+06	3.53809e+06	4.15596e+06	3.35222e+06	322412	326654	326765	355671	313368	374422	635168	661559	745472	697253	750992	754059	358703	376017	350976	439272	387600	428814	1.22971e+06	1.12267e+06	1.16999e+06	1.10802e+06	1.18449e+06	1.19041e+06
Sulforaphane	C6 H11 N O S2	177.028	1.943	515311	272261	236440	261434	265991	206593	252549	616343	625226	544399	598431	678534	621952	75487.9	16766.9	79115.3	83682.8	21186.2	14220.9	395899	406173	333629	243513	333697	419808	561945	387647	410823	436820	376761	445633	291671	298724	228104	261925	302607	260867	281319	56914.2	257120	96623.5	388272	273657
2-Isopropyl-4,5-dimethyl-1,3-thiazole	C8 H13 N S	155.077	6.999	2.54977e+06	2.04434e+06	2.0345e+06	1.92188e+06	1.89478e+06	2.10024e+06	1.99727e+06	1.40509e+06	1.30088e+06	1.30973e+06	1.30582e+06	1.38267e+06	1.36546e+06	896105	991933	929242	995039	1.00174e+06	980324	2.77979e+06	2.94735e+06	2.96326e+06	2.6675e+06	2.86223e+06	3.16596e+06	3.28115e+06	3.28744e+06	3.10413e+06	3.13902e+06	3.3215e+06	3.08197e+06	2.21253e+06	2.02111e+06	2.11563e+06	2.2942e+06	2.20195e+06	2.20749e+06	1.88728e+06	1.82526e+06	2.02871e+06	1.76184e+06	1.86134e+06	1.88917e+06
coniferaldehyde β-D-glucoside	C16 H20 O8	340.115	4.386	95235.4	96571	90068.1	92447.2	102453	90904.5	91255.4	66095.3	66158.1	72697.3	73254	65717.6	77198.2	86724.7	85181.2	93181.7	86839.4	83943.1	86552.1	78998.9	84279.8	82314.5	80357.3	84526.1	84939	91391.2	93704.1	89730.1	94476	97374	93782.2	84309.9	81273.2	84911	90342.2	91442	93032.6	79342.9	77791.9	78152.6	70143.5	76862.1	80575
2-Methyl-4-ethyl-5-propylthiazole	C9 H15 N S	169.092	5.322	2.55457e+06	764439	804682	791607	601970	729680	695896	2.78649e+06	1.62241e+06	1.78046e+06	2.67022e+06	1.90539e+06	2.5294e+06	32924.3	23846.2	26508.7	28127.6	29714.6	25848.9	1.39547e+06	1.71893e+06	1.49325e+06	1.2493e+06	1.95593e+06	1.9435e+06	1.78997e+06	3.07028e+06	3.0464e+06	1.76388e+06	3.1364e+06	1.83364e+06	1.06759e+06	1.26318e+06	1.4225e+06	1.72551e+06	1.63282e+06	1.51911e+06	780974	724074	725989	850440	687640	766517
2-methylcitric acid	C7 H10 O7	206.042	0.953	2.02232e+06	1.62223e+06	1.98248e+06	1.807e+06	1.66362e+06	1.47548e+06	2.19691e+06	1.31857e+06	1.07873e+06	1.4358e+06	1.60608e+06	1.44438e+06	1.09946e+06	325127	316109	292854	285930	389220	361467	2.25644e+06	2.47477e+06	2.61057e+06	2.00693e+06	2.08808e+06	2.98916e+06	1.85208e+06	1.64704e+06	2.18493e+06	2.18147e+06	1.71754e+06	1.71041e+06	1.74295e+06	1.53744e+06	1.25179e+06	1.62558e+06	1.85411e+06	1.75676e+06	1.3498e+06	1.15797e+06	1.18207e+06	1.32527e+06	1.51247e+06	1.09531e+06
2-O-(beta-D-glucosyl)-sn-glycerol 3-phosphate	C9 H19 O11 P	334.066	1.338	2.97458e+06	4.01117e+06	3.53877e+06	3.58592e+06	3.43982e+06	3.90852e+06	3.72417e+06	3.11839e+06	2.62385e+06	2.83367e+06	2.90415e+06	2.97792e+06	3.51947e+06	1.01235e+06	950492	781649	849659	939730	937878	2.65395e+06	2.9717e+06	2.67138e+06	2.36164e+06	830713	2.95877e+06	3.34256e+06	877560	2.95432e+06	3.07176e+06	3.57153e+06	3.3665e+06	1.87003e+06	1.98423e+06	1.87727e+06	2.05908e+06	1.96122e+06	2.08526e+06	2.87843e+06	1.88378e+06	2.13124e+06	2.30309e+06	2.34102e+06	2.43641e+06
3-(Butylsulfinyl)-L-alanin	C7 H15 N O3 S	193.077	0.885	1.92134e+06	1.05973e+06	842618	892795	1.13488e+06	1.04502e+06	940535	752062	1.03969e+06	889094	743844	707713	904994	1.81206e+06	1.75634e+06	1.86237e+06	1.93213e+06	1.86324e+06	1.78139e+06	1.16195e+06	880744	894082	1.05937e+06	1.12435e+06	915524	1.08173e+06	1.14864e+06	953220	1.02756e+06	980570	1.11076e+06	845463	929083	914009	819658	867505	890544	991385	1.01871e+06	1.19691e+06	968942	980579	943265
indol-3-ylmethyl-ascorbate	C15 H15 N O6	305.089	5.396	2.35168e+06	846258	752337	859448	863356	747260	766356	1.71976e+06	1.75377e+06	1.71279e+06	1.84275e+06	1.83935e+06	1.65943e+06	418094	321989	328981	347754	403230	378125	1.74713e+06	1.9616e+06	1.96959e+06	1.9854e+06	1.70195e+06	1.8865e+06	2.689e+06	3.01518e+06	2.78343e+06	2.86177e+06	2.61972e+06	2.62752e+06	1.48419e+06	1.521e+06	1.44054e+06	1.44257e+06	1.44282e+06	1.4433e+06	1.53232e+06	1.19763e+06	1.33438e+06	1.37168e+06	1.27966e+06	1.44301e+06
pheophorbide b	C35 H34 N4 O6	606.247	13.36	497689	640152	516004	503927	538695	585484	535082	288558	282238	279131	288946	266713	285632	422969	389090	400960	408947	393863	403464	282960	245959	204508	237017	264599	234100	443339	397924	403480	467522	379406	382711	280111	315579	344597	286680	271201	265839	424948	313387	375390	369315	400602	376712
3-Acetyl-2,7-naphthyridine	C10 H8 N2 O	172.064	4.809	136731	134964	149104	146893	155948	148907	156410	78863.8	82747.3	85282	87398	85471.2	91402.5	127145	132544	128877	134340	139929	137518	126890	133673	145032	144511	135345	155934	127759	123052	132589	132540	119985	124053	123223	122569	121747	131026	121072	130021	116326	111903	120260	107426	115327	114983
3-O-beta-D-galactosyl-sn-glycerol	C9 H18 O8	254.1	0.896	905599	740110	660691	706264	760402	789030	783827	175145	228113	178686	136073	186494	239963	566906	497554	521854	582768	564117	521628	987425	951671	933657	920728	1.18552e+06	1.00245e+06	442082	489019	370388	436837	497258	498688	539911	518303	522267	488493	545694	537089	548938	505396	477458	464928	529844	526398
3-O-feruloyl-D-quinic acid	C17 H20 O9	368.11	5.882	8.6185e+06	5.42652e+06	5.45207e+06	4.92191e+06	5.72754e+06	5.28584e+06	6.75216e+06	7.90917e+06	7.64269e+06	7.45798e+06	7.27583e+06	7.54264e+06	7.75043e+06	2.08369e+06	2.02329e+06	2.11947e+06	2.21783e+06	2.11855e+06	2.06975e+06	8.74482e+06	8.71059e+06	9.03624e+06	8.66511e+06	8.9752e+06	9.77768e+06	1.04865e+07	9.51996e+06	1.08223e+07	1.07945e+07	1.04817e+07	1.04303e+07	8.3411e+06	8.02055e+06	8.0272e+06	7.4771e+06	8.44527e+06	8.60168e+06	6.27132e+06	6.34382e+06	5.2817e+06	5.79552e+06	6.3166e+06	6.25159e+06
3-Phenylpropanoic acid	C9 H10 O2	150.068	5.22	169925	81919.3	46240.7	72852.1	85886.8	72671	8940.23	108523	136517	99501.2	107893	100774	70404.3	168847	169824	172823	164507	164342	157823	5272.39	45929.8	32863.8	33364.4	53025.2	47461.4	7591.98	53423.1	48852	9592.76	66034.5	44826.4	9050.11	52514	24052.6	60480.7	10550.8	69796.3	95013.5	74495.1	81179.5	88900.5	68162.2	82472.2
3-Sulfamoylalanine	C3 H8 N2 O4 S	168.021	1.134	7.37315e+06	3.49281e+06	4.91334e+06	5.60364e+06	3.76064e+06	3.56889e+06	5.10692e+06	9.535e+06	7.16171e+06	6.84224e+06	8.03769e+06	9.07694e+06	7.59567e+06	4.89529e+06	5.76347e+06	3.56763e+06	3.34513e+06	4.63166e+06	5.34019e+06	769423	673208	703008	981652	595311	625473	1.55844e+06	1.15771e+06	1.76386e+06	2.22798e+06	1.3419e+06	1.21019e+06	5.9475e+06	6.18264e+06	5.47803e+06	5.31556e+06	5.24312e+06	5.70997e+06	4.73133e+06	4.74691e+06	5.63045e+06	3.94751e+06	3.37178e+06	5.81682e+06
4-Hydroxybenzoate-O-glucoside	C13 H16 O8	300.084	4.725	460796	88596.6	94489.7	84950.3	91114.4	84707.3	93107	67915.4	58793.1	52281	67400.5	56302.9	54224.4	420204	415447	458910	401465	441604	472278	50565.9	43935.3	43354.1	47239.4	38848	47919.8	39581.7	51972.4	43073.2	47377.8	44479.2	47529.6	52114.9	46795.9	48866.1	44918.4	44505	48041.1	143580	141109	151392	160662	130876	130709
4-(Dimethylsulfonio)-2-hydroxybutanoate	C6 H12 O3 S	164.051	2.017	5.86646e+06	251651	346411	377385	301888	272673	350088	140560	141866	120348	176374	152054	131512	5.70543e+06	5.83372e+06	4.66495e+06	4.55842e+06	5.81998e+06	5.84108e+06	86310.9	116304	108959	53748.4	69919	126936	63258.6	25329.3	89921.8	90548	81465.4	46025.8	38462.9	41854.3	47546.2	39090.6	39613.6	45578	1.57569e+06	1.10094e+06	1.00721e+06	1.40188e+06	1.39336e+06	1.29713e+06
4-(Heptyloxy)benzoic acid	C14 H20 O3	236.141	5.848	489094	91496.9	95385.2	82335.9	84136.1	72034.3	88491.4	36806.8	37369.5	56091.4	55264.1	48067.8	42225.5	406291	463316	464994	484059	480690	500398	39018.7	39032.4	40216.4	44196.8	39628.3	42097.6	41022.3	42749	40621.2	46205.2	54286.3	44931.6	38106.7	41451.3	41328.4	42925.2	50287	49691.1	136182	139990	109099	114710	146609	101244
4-[(2E)-3,7-Dimethyl-2,6-octadien-1-yl]-2-formyl-3-hydroxy-5-methoxybenzyl stearate	C37 H60 O5	584.443	14.328	220910	72461.9	57003.4	66693.8	49910.4	41251.9	49664.1	161560	141868	167343	149789	144316	210458	201118	185237	162927	183840	202597	184320	182705	207861	189918	133218	114677	103364	230465	243548	222532	222774	205566	238625	176435	259407	210204	180867	160434	204838	136414	165112	194644	157678	170429	129136
4-Aminobenzoic acid	C7 H7 N O2	137.047	0.861	441808	415947	453086	409172	482151	501133	421099	336148	350725	381133	314784	250190	400604	364807	331733	342830	341692	361545	417436	535212	698792	659984	579277	624702	678318	486569	429091	442087	413460	349642	582202	413866	361983	415587	398002	416779	394383	338090	398683	387631	304906	451341	317585
4-Oxo-4-(1H-purin-6-ylamino)butanoic acid	C9 H9 N5 O3	235.07	1.296	1.52305e+07	9.12411e+06	1.45192e+07	1.38638e+07	1.04893e+07	9.94656e+06	1.4936e+07	3.90758e+06	2.44324e+06	3.22514e+06	4.2992e+06	4.02506e+06	2.81781e+06	1.33981e+07	1.35439e+07	9.80241e+06	1.03673e+07	1.52386e+07	1.33529e+07	1.70362e+07	2.13798e+07	2.10694e+07	1.51317e+07	1.5987e+07	2.5646e+07	6.94164e+06	6.75114e+06	9.59094e+06	7.93019e+06	6.85267e+06	6.45755e+06	7.84775e+06	7.34652e+06	5.17897e+06	8.63227e+06	8.8229e+06	8.95246e+06	9.59334e+06	7.11389e+06	7.04943e+06	1.02848e+07	1.04154e+07	6.84439e+06
3-enolpyruvyl-shikimate-5-P	C10 H13 O10 P	324.024	1.942	936187	802678	721743	729202	881307	751659	767189	198415	247026	200487	218897	253700	234105	826046	947292	999510	1.03874e+06	939581	916265	612582	773266	626309	603714	367874	767645	299018	388927	312670	393882	402885	324914	453831	512098	450518	486211	510238	571718	527809	688871	605419	566006	585344	600200
5-guanidino-2-oxopentanoic acid	C6 H11 N3 O3	173.08	0.946	222481	93636.6	84079.4	92904.2	97304.4	102095	70776	48510	42981.1	53551.4	40676.6	51198.7	54632.3	165744	138838	226009	217395	170004	162839	69995.5	60272.9	78618.2	71427.3	73804.3	72571.4	88964.6	94253.6	61075.3	59385.9	81596.8	69773.6	51808.4	70582.4	84522.3	62534.6	82018.6	77637.1	95677	91444.8	116600	79878.1	75658.8	110928
5-Hydroxy-2-furoic acid	C5 H4 O4	128.011	1.552	1.0321e+06	60633.8	87868.3	92572.2	65171.3	75310.9	75920.5	1.27703e+06	990663	1.04542e+06	1.24212e+06	1.29761e+06	1.08589e+06	282946	274941	270801	301358	348027	279204	27470.8	32616.3	35085.7	25101.7	25593.2	31763.8	63765.2	52461.3	65567.6	65622.2	73202.3	69602.3	141894	168211	151842	177482	152944	165887	252369	222983	176883	222024	258609	218373
5-Hydroxy-DL-tryptophan	C11 H12 N2 O3	220.085	1.838	600204	65893.3	88472.8	77890.4	66692.4	70094.5	94845.3	94818.6	76056	73823.2	96449.3	91314.4	76090.8	599183	651019	501207	467178	618349	642322	51011.4	74324.2	77413.2	57024.2	61472.2	81542.2	68328.6	40170.3	72988.4	82875.2	81193.8	63607.1	57764.6	56075.8	51323.8	63004.3	69411.5	68097.4	163424	126641	137684	168587	116257	129145
5-Hydroxyindole	C8 H7 N O	133.053	4.244	917813	391657	496778	499037	421605	483352	431665	484084	478376	472812	569194	568319	565583	946556	956882	710816	600885	951456	793847	223286	238202	270596	218179	223803	240282	294677	300027	311983	319242	335328	317433	215951	175835	220898	226057	226776	199205	504600	398110	489088	394688	449999	479957
5-Indolol	C8 H7 N O	133.053	5.93	165098	82745.6	77031.2	63293.6	84405.5	85468	68634.5	61208.4	54534.3	66647.3	57009.7	74256.5	60077.3	71867.9	69264.3	68769.6	67209	75062.1	85452.5	112791	95432.8	105833	98379.9	102657	101653	203318	207398	217093	214404	200027	208784	138501	158262	132875	145325	145742	151867	86160.8	89095.3	90386.1	65158.8	85366.1	92325.6
5-methylthioribose	C6 H12 O4 S	180.045	1.316	638217	29948.7	26492.6	22811.4	30243.9	27284.8	19742.4	19368.6	23117.5	23133.6	26958.8	24806.5	25249.6	581254	571035	682276	683679	550096	557524	13603.9	14348.9	19815.6	17401.6	22554.1	8479.67	16326.1	17367	14374.9	23759.6	17498.6	18902.3	11655.8	9826.92	11819.8	5769.15	9029.17	6594.52	110956	143565	159394	161578	147480	151280
5'-O-beta-D-Glucosylpyridoxine	C14 H21 N O8	331.126	0.916	2.54329e+06	3.21353e+06	2.46254e+06	3.00017e+06	2.96584e+06	2.96443e+06	2.62486e+06	1.67479e+06	1.94866e+06	2.10441e+06	1.63279e+06	1.83297e+06	1.98962e+06	1.47967e+06	1.48817e+06	1.39069e+06	1.41075e+06	1.33175e+06	1.33095e+06	2.91215e+06	2.59263e+06	2.60737e+06	2.59325e+06	2.70211e+06	2.40867e+06	2.92528e+06	2.63406e+06	2.40774e+06	3.42176e+06	3.09684e+06	3.28089e+06	2.86936e+06	3.06303e+06	2.9847e+06	2.7899e+06	2.94026e+06	3.04096e+06	1.65254e+06	2.23359e+06	2.25577e+06	1.72309e+06	1.67146e+06	2.05916e+06
6-Decylubiquinol	C19 H32 O4	324.229	8.774	1.73383e+07	2.39091e+07	2.61996e+07	2.32398e+07	2.46153e+07	2.30509e+07	2.45932e+07	6.79966e+06	6.88016e+06	6.87927e+06	6.87097e+06	7.00942e+06	7.07938e+06	1.37704e+06	1.27656e+06	1.37271e+06	1.37156e+06	1.31935e+06	1.35535e+06	1.15642e+07	1.20349e+07	1.19077e+07	1.17986e+07	1.23856e+07	1.30161e+07	2.10628e+07	2.01145e+07	2.19253e+07	2.22963e+07	2.07545e+07	2.13253e+07	2.04338e+07	2.04006e+07	2.13536e+07	2.22294e+07	1.95405e+07	2.1765e+07	1.2353e+07	1.22932e+07	1.23939e+07	1.33906e+07	1.20639e+07	1.21117e+07
8-(Methylsulfinyl)octyl isothiocyanate	C10 H19 N O S2	233.09	7.577	1.67768e+08	1.53103e+08	1.5676e+08	1.55921e+08	1.65797e+08	1.40298e+08	1.52804e+08	9.05577e+07	8.97057e+07	9.04331e+07	9.08886e+07	9.70822e+07	9.17239e+07	8.31842e+07	7.99864e+07	8.10657e+07	8.20878e+07	8.3683e+07	8.10339e+07	1.90591e+08	1.95532e+08	1.99566e+08	1.87426e+08	1.98532e+08	2.06389e+08	1.99912e+08	2.05513e+08	1.97291e+08	1.96271e+08	2.05645e+08	2.16141e+08	1.63816e+08	1.39363e+08	1.71663e+08	1.43431e+08	1.56343e+08	1.42495e+08	1.39159e+08	1.45875e+08	1.42769e+08	1.46364e+08	1.38684e+08	1.40815e+08
9-(3-Methyl-5-pentyl-2-furyl)nonanoic acid	C19 H32 O3	308.235	10.821	245901	130299	102085	127509	146783	119661	108820	54213.7	53993.4	56418.3	50663.4	52879.1	53230.2	238748	249743	215544	216848	228475	241687	264993	314952	254475	253179	261192	292007	168896	147950	152333	167954	164081	163529	84201.6	85553.9	84920.2	73299.1	73472.2	95523.9	132132	137805	154448	126168	134546	137884
9-[(methylthio)nonyl]thiohydroximate	C10 H21 N O S2	235.106	6.946	344032	178101	197329	177068	173397	192091	207718	366228	286534	279681	284770	382711	370907	34504.4	34026.7	33988.5	34770.3	38401.8	34642.9	261584	256748	243940	254049	266833	255231	268239	268901	297504	288062	296981	323340	173686	187879	159521	168586	161727	165584	155437	138858	128113	142939	154514	177519
9-Oxo-10(E),12(E)-octadecadienoic acid	C18 H30 O3	294.219	10.833	1.43073e+06	421497	374314	374554	407841	368689	395447	131145	111414	110279	140196	122274	139668	1.40636e+06	1.37669e+06	1.41232e+06	1.40042e+06	1.45009e+06	1.45999e+06	683256	761640	682317	715216	691313	736926	371400	382209	379054	445107	375788	435707	252650	208118	241648	267538	199573	219593	499299	465748	549225	586007	494576	465170
aconitate A	C7 H8 O6	188.032	0.947	1.0845e+06	960175	1.09258e+06	1.02365e+06	976199	883235	1.09668e+06	776862	590277	766789	813654	785025	651041	132074	149460	115528	119645	170186	153410	1.19094e+06	1.33743e+06	1.41284e+06	1.05344e+06	1.09592e+06	1.54635e+06	1.0172e+06	845485	1.14901e+06	1.12665e+06	888542	890720	894894	792114	716328	818293	953902	896237	727508	672201	667491	716741	864230	601398
Adenine	C5 H5 N5	135.054	1.292	2.48394e+06	1.45885e+06	2.1941e+06	2.13038e+06	1.85095e+06	1.65146e+06	2.2141e+06	696278	412425	525226	651150	660136	443915	2.18195e+06	2.23652e+06	1.79382e+06	1.69075e+06	2.63539e+06	2.32886e+06	2.5902e+06	3.10217e+06	3.11731e+06	2.38587e+06	2.37316e+06	3.67943e+06	1.17549e+06	1.00221e+06	1.57776e+06	1.12282e+06	1.24252e+06	1.00123e+06	1.12804e+06	1.09837e+06	933659	1.27476e+06	1.28789e+06	1.29022e+06	1.50583e+06	1.06376e+06	1.0934e+06	1.50969e+06	1.61242e+06	1.07164e+06
Adenosine	C10 H13 N5 O4	267.096	1.291	1.52305e+07	9.12411e+06	1.45192e+07	1.38638e+07	1.04893e+07	9.94656e+06	1.4936e+07	3.90758e+06	2.44324e+06	3.22514e+06	4.2992e+06	4.02506e+06	2.81781e+06	1.33981e+07	1.35439e+07	9.80241e+06	1.03673e+07	1.52386e+07	1.33529e+07	1.70362e+07	2.13798e+07	2.10694e+07	1.51317e+07	1.5987e+07	2.5646e+07	6.94164e+06	6.61992e+06	9.59094e+06	7.93019e+06	6.85267e+06	6.45755e+06	7.84775e+06	7.34652e+06	5.17897e+06	8.63227e+06	8.8229e+06	8.95246e+06	9.59334e+06	7.11389e+06	7.04943e+06	1.02848e+07	1.04154e+07	6.84439e+06
Adenosine 5'-monophosphate	C10 H14 N5 O7 P	142.027	0.992	2.6308e+06	1.6673e+06	1.53018e+06	1.2537e+06	1.32989e+06	1.63154e+06	1.3842e+06	698970	903726	784932	784537	849193	1.00142e+06	1.85058e+06	2.13853e+06	2.26272e+06	2.57079e+06	1.50406e+06	2.55196e+06	2.93448e+06	2.82156e+06	2.18414e+06	3.34497e+06	3.60131e+06	906488	2.05021e+06	1.84579e+06	2.23506e+06	2.11683e+06	2.03135e+06	2.1772e+06	1.44187e+06	1.13324e+06	1.27469e+06	1.35183e+06	826636	911152	1.26364e+06	1.57356e+06	1.94138e+06	1.20235e+06	1.35443e+06	1.5059e+06
Adenylthiomethylpentose	C11 H15 N5 O3 S	297.089	4.348	554828	168755	196113	174837	170432	174193	190818	109440	97930.3	100226	108368	104922	115121	575109	592331	591858	564709	594531	574441	110554	127382	113223	118616	113647	123549	125613	125131	132317	132189	132933	130842	83491	76895.6	79975.6	87983.7	86365.2	79475.9	214202	191827	198918	196001	184126	213779
alpha-Ketoglutaric acid	C5 H6 O5	146.021	1.556	1.19951e+06	73141.1	105981	100144	87325.2	87027.5	92779.7	1.516e+06	1.17394e+06	1.22027e+06	1.46892e+06	1.5002e+06	1.28867e+06	342030	326877	314015	343455	395855	345048	32081.3	36973	41794	30242.5	29616.4	45494.3	71575.9	64516.4	83997.9	77827.9	88241.4	74587.2	171091	188149	168934	200838	165988	192739	290110	261168	213918	258666	299496	253863
Aminolevulinic acid	C5 H9 N O3	131.058	0.832	770699	376684	393020	414484	346240	362176	377165	311543	367518	233354	288670	261689	365920	757175	719272	654236	681254	745154	762356	480319	449300	458503	380066	427580	471679	346099	329390	300072	352341	322237	402646	453613	428825	343358	442512	428224	421156	429075	404654	408877	415090	408315	419047
Arachidonic acid	C20 H32 O2	304.24	13.442	701814	604491	623280	619415	580019	573987	687581	684931	697322	624558	595688	667232	692383	363235	369444	345684	395674	342393	353510	3516.69	4490.76	3087.89	6974.73	2720.91	3254.55	3371.41	4722.15	5155.84	3724.3	3696.17	6054.98	4671.2	8739.1	5365.79	10486.8	8071.25	4293.26	324101	300455	252094	277402	292083	338255
Aspartyl-L-proline	C9 H14 N2 O5	230.09	0.948	347323	145985	112202	128098	158923	158682	139469	118827	143965	133538	91150.7	115580	137033	225104	201648	296758	350167	252447	291204	151447	121893	140644	157836	174950	133531	152811	191158	156382	161105	151951	155706	113323	136576	137060	115290	106280	120570	150417	171785	213232	145726	128513	187555
asp-leu	C10 H18 N2 O5	246.121	1.153	307950	46430.5	49200	54428.3	49117.6	51512	58255.7	40371.2	42282.9	44666.1	40549.9	43392.2	36303.8	252048	224823	122453	254898	236065	306722	94691.3	93587.6	105746	93539.9	83283.9	104805	43672.8	58569	54227.7	56140.4	58726.2	60927.9	56298.6	48383.3	55536.4	61341.2	58198.1	55950.7	75470.3	59354.6	79972.2	85099.7	84878.9	55962
Asp-tyr	C13 H16 N2 O6	296.1	4.298	192721	12783.9	14282.8	15693.4	13704.3	13981.9	12989.2	9284.33	4203.35	9123.84	8761.01	8506.23	6798.87	186583	196526	172716	173400	181416	171970	7756.27	7112.11	5869.14	9162.73	6908.07	6845.86	10440.3	10946.6	12264.4	11627.5	12308.3	11079.2	9181.85	8392.61	7254.43	11223.4	8302.72	9532.73	44551.4	41716	39287.9	43976.6	46690.5	39923.3
Benzoic acid	C7 H6 O2	122.037	1.207	1.40111e+06	234620	226132	223283	244509	257872	197272	280104	213120	182898	192330	266464	182915	1.28093e+06	1.42515e+06	1.43507e+06	1.4192e+06	1.29406e+06	1.42183e+06	219119	245027	245450	242022	217529	219204	306152	331421	315879	331095	327997	371807	263325	239044	246384	291830	383654	325188	476964	468704	455504	423846	486039	464636
benzoquinone	C6 H4 O2	108.021	1.338	239689	348567	333241	342637	303786	315264	303880	363637	327449	336852	357290	331378	345517	199125	165794	162847	174951	165025	163723	252441	241576	202418	244337	227216	256054	267310	272353	244262	227811	235257	243529	202820	234638	229946	197248	233406	242354	254030	197250	225128	235115	208981	237284
beta-d-glucose pentaacetate	C16 H22 O11	390.117	5.527	320278	263227	264970	246716	260416	275014	272189	82235.9	97491.3	89493.2	104562	81328.1	95114.3	283373	298118	306037	304747	324417	306216	328939	351090	372705	363389	351660	382937	160628	179352	163964	172937	161118	179968	156753	170062	181630	150067	166282	184147	280950	238995	262065	240469	339664	219523
camalexin	C11 H8 N2 S	200.041	6.858	1.19893e+08	671713	673672	624729	572328	659016	700088	418428	400942	430709	429819	401863	397453	1.07003e+08	1.08407e+08	1.23165e+08	1.09389e+08	1.25048e+08	1.22119e+08	5.95979e+06	6.07225e+06	6.12453e+06	6.17524e+06	6.19278e+06	6.39392e+06	4.7036e+06	4.76469e+06	5.08207e+06	5.09451e+06	5.06701e+06	5.15795e+06	4.43903e+06	4.29247e+06	4.40728e+06	4.50977e+06	4.50328e+06	4.2493e+06	3.16495e+07	3.01515e+07	3.00103e+07	2.8483e+07	3.04364e+07	3.12147e+07
Cinnamic acid	C9 H8 O2	148.052	1.952	1.55671e+07	4.71006e+06	3.82712e+06	3.52105e+06	4.22332e+06	4.17995e+06	4.29429e+06	2.3467e+06	2.20618e+06	2.27097e+06	2.2521e+06	2.3013e+06	2.46837e+06	1.42921e+07	1.49086e+07	1.56243e+07	1.57031e+07	1.55871e+07	1.40177e+07	2.95434e+06	3.18461e+06	3.21178e+06	2.49899e+06	3.44025e+06	3.32902e+06	3.30064e+06	3.64659e+06	3.19679e+06	3.92523e+06	3.68433e+06	3.50133e+06	4.99461e+06	5.55909e+06	4.96304e+06	5.76496e+06	5.0366e+06	5.64838e+06	4.57397e+06	4.96374e+06	5.64151e+06	4.85856e+06	4.55729e+06	5.90976e+06
Cinnamyl alcohol	C9 H10 O	134.073	8.858	194728	242484	237381	271930	291318	230727	256921	192129	211525	218908	238913	215906	222515	147878	141962	150408	128306	120606	176772	182913	208518	201300	245907	188102	245484	199014	192716	177860	201695	194786	172086	164943	214681	186512	218938	216506	230745	177646	147370	169699	168788	153948	171333
Citric acid	C6 H8 O7	192.027	1.553	2.63684e+06	148204	243755	192014	178204	173027	237552	2.83441e+06	2.88384e+06	2.56925e+06	3.07823e+06	3.20047e+06	3.07737e+06	671367	608410	480497	681683	696867	721202	44119.2	62268.8	61901	45592.3	44427.4	67460.2	118704	98089.2	150092	147574	144757	113101	355909	329919	284342	389101	356755	364244	592136	539014	417793	529052	594195	405573
Coumarin	C9 H6 O2	146.037	4.964	1.4861e+06	1.20059e+06	1.33256e+06	1.2155e+06	1.32286e+06	1.08828e+06	1.30548e+06	1.36972e+06	1.36868e+06	1.35943e+06	1.29896e+06	1.23932e+06	1.20263e+06	654571	616633	666330	658332	641176	653437	1.57437e+06	1.55691e+06	1.69661e+06	1.55545e+06	1.61863e+06	1.58428e+06	1.87927e+06	1.75434e+06	1.86002e+06	1.71762e+06	1.87231e+06	1.84883e+06	1.73103e+06	1.71929e+06	1.75286e+06	1.72722e+06	1.66649e+06	1.64141e+06	1.16438e+06	1.32773e+06	1.02579e+06	1.37248e+06	968194	1.29018e+06
Coumarone	C8 H6 O	118.042	1.206	5.60468e+06	590224	585829	609624	620745	625679	621978	651021	681480	643117	648320	669210	715323	4.99526e+06	5.40357e+06	5.7726e+06	5.68674e+06	5.56261e+06	5.51069e+06	677154	647091	611246	616725	606176	609995	1.14992e+06	1.16501e+06	1.05935e+06	1.09112e+06	1.06517e+06	1.17135e+06	792853	757480	860122	813898	748663	850733	1.71236e+06	1.71813e+06	1.59764e+06	1.6094e+06	1.64913e+06	1.72062e+06
cyclo-Dopa 5-O-glucoside	C15 H19 N O9	357.105	5.684	2.29612e+06	2.31134e+06	2.30199e+06	2.53951e+06	2.27976e+06	2.29026e+06	1.89572e+06	2.55656e+06	2.78424e+06	2.72196e+06	2.83056e+06	2.29111e+06	2.70027e+06	445972	402802	451933	465974	470646	527813	1.63047e+06	2.09282e+06	1.961e+06	1.97111e+06	2.0139e+06	2.15842e+06	1.48985e+06	1.55859e+06	1.45678e+06	1.65575e+06	1.71346e+06	1.69953e+06	1.11255e+06	1.05295e+06	1.13012e+06	1.12017e+06	1.15634e+06	1.05906e+06	1.35906e+06	1.45285e+06	1.32143e+06	1.11618e+06	1.52729e+06	1.33674e+06
Cytidine	C9 H13 N3 O5	243.085	1.11	4.46858e+06	5.88006e+06	6.80937e+06	6.69426e+06	6.28754e+06	6.68026e+06	6.51694e+06	6.15936e+06	6.22828e+06	6.6307e+06	6.01066e+06	6.18683e+06	6.16762e+06	2.69457e+06	2.52651e+06	2.64149e+06	2.69455e+06	2.61329e+06	2.76698e+06	4.22815e+06	3.79706e+06	4.30742e+06	3.8327e+06	4.46706e+06	4.65712e+06	4.23063e+06	4.9139e+06	4.55711e+06	4.34019e+06	4.75308e+06	4.47593e+06	3.59966e+06	3.69277e+06	3.59711e+06	3.72447e+06	3.81801e+06	3.91779e+06	4.30069e+06	3.52852e+06	3.82957e+06	4.25718e+06	3.81225e+06	4.22412e+06
D-Glucose 6-phosphate	C6 H13 O9 P	260.029	1.339	2.46905e+06	3.19237e+06	3.32011e+06	3.19433e+06	3.42123e+06	3.25152e+06	3.31156e+06	3.0505e+06	3.11622e+06	3.25277e+06	3.2333e+06	2.89041e+06	2.90665e+06	1.83745e+06	1.73418e+06	1.55553e+06	1.6543e+06	1.96437e+06	1.89668e+06	2.36403e+06	2.41162e+06	2.52655e+06	2.19459e+06	2.26453e+06	2.78246e+06	2.47325e+06	2.13303e+06	2.55512e+06	2.39818e+06	2.46035e+06	2.72952e+06	1.99632e+06	1.9243e+06	1.95036e+06	2.06473e+06	2.12127e+06	2.10569e+06	2.96944e+06	2.00434e+06	1.97956e+06	2.32126e+06	2.38932e+06	2.52653e+06
Dihydrothymine	C5 H8 N2 O2	128.058	0.862	666924	559552	602581	591203	677097	583207	703440	414910	410152	391582	476517	451026	432625	466689	484657	490745	476782	471820	515511	702902	669219	603920	727821	640201	851380	765599	617518	806640	853237	760386	676572	621419	582738	577414	639001	682184	624447	534907	517839	483370	479586	553171	499042
DL-2,6-Diaminopimelic acid	C7 H14 N2 O4	190.095	0.847	1.42449e+07	945172	1.23613e+06	1.12882e+06	904306	946972	1.2393e+06	808924	708618	623103	801038	753446	702159	1.33244e+07	1.31833e+07	1.16106e+07	1.22941e+07	1.33475e+07	1.4488e+07	956698	1.21483e+06	1.11877e+06	982876	1.03522e+06	1.14198e+06	874382	776349	1.02273e+06	1.03622e+06	939620	962322	1.1866e+06	1.00356e+06	987502	1.17663e+06	1.22058e+06	1.21572e+06	4.29241e+06	4.06169e+06	3.6196e+06	3.58505e+06	4.38264e+06	4.04952e+06
DL-Citrulline	C6 H13 N3 O3	175.095	0.81	1.7598e+07	9.50783e+06	9.77094e+06	8.74524e+06	8.60945e+06	9.00585e+06	9.07615e+06	1.21646e+07	1.21478e+07	1.05479e+07	1.1817e+07	1.08793e+07	1.10008e+07	6.317e+06	6.67699e+06	7.00851e+06	6.40078e+06	6.72422e+06	6.87404e+06	1.32832e+07	1.2774e+07	1.28925e+07	1.19005e+07	1.28386e+07	1.51911e+07	1.99561e+07	2.01105e+07	2.13872e+07	2.17818e+07	1.9599e+07	2.09523e+07	1.40373e+07	1.37295e+07	1.23396e+07	1.43443e+07	1.40109e+07	1.38153e+07	1.32422e+07	1.16494e+07	1.18222e+07	1.10933e+07	1.1126e+07	1.32785e+07
DL-Glutamic acid	C5 H9 N O4	147.053	0.826	1.00712e+08	1.02552e+08	1.00849e+08	9.54174e+07	8.99572e+07	9.45455e+07	1.07796e+08	1.04606e+08	9.52787e+07	9.37348e+07	9.79914e+07	9.47939e+07	9.78696e+07	5.11835e+07	4.93176e+07	4.63505e+07	4.83519e+07	5.43734e+07	5.00144e+07	8.48907e+07	9.2785e+07	9.13721e+07	8.35811e+07	8.73355e+07	1.01907e+08	1.09636e+08	1.04629e+08	1.2745e+08	1.15987e+08	1.07738e+08	1.16185e+08	8.70282e+07	8.15247e+07	7.38402e+07	8.46105e+07	8.23175e+07	8.66963e+07	8.14063e+07	7.92324e+07	7.40779e+07	8.09297e+07	8.18083e+07	7.71673e+07
DL-Glutamine	C5 H10 N2 O3	146.069	0.801	1.14506e+08	1.22888e+08	1.16597e+08	1.13803e+08	1.05548e+08	1.1825e+08	1.24014e+08	1.49159e+08	1.31237e+08	1.31562e+08	1.39184e+08	1.35962e+08	1.4059e+08	6.70993e+07	6.23306e+07	5.75491e+07	5.8334e+07	6.56533e+07	6.26188e+07	7.16414e+07	7.7387e+07	7.95169e+07	7.4733e+07	7.47019e+07	8.90513e+07	1.32594e+08	1.40516e+08	1.4279e+08	1.3114e+08	1.27767e+08	1.28147e+08	1.01479e+08	9.88066e+07	9.1986e+07	1.05921e+08	9.88298e+07	1.08518e+08	1.04745e+08	8.89037e+07	8.09625e+07	9.20995e+07	9.00733e+07	9.84111e+07
DL-Histidine	C6 H9 N3 O2	155.069	0.768	2.99755e+06	457397	437960	469204	454740	526090	399969	379349	347137	347186	344581	413758	399311	2.13164e+06	1.86629e+06	2.00844e+06	3.03974e+06	1.89897e+06	1.98183e+06	360693	353173	362464	392326	396734	358983	496024	560248	668799	635154	602827	704359	673050	664470	870009	881780	620071	588599	1.184e+06	1.12242e+06	1.19067e+06	753692	1.26905e+06	1.16349e+06
DL-Lysine	C6 H14 N2 O2	146.105	0.659	3.31892e+06	715293	703689	617219	744354	730904	726135	483317	541083	555569	541744	486810	562797	3.13086e+06	3.26813e+06	3.16567e+06	2.37596e+06	3.30089e+06	3.42727e+06	854365	911367	878711	808999	885192	896249	1.09531e+06	1.10222e+06	1.15609e+06	989362	1.1535e+06	1.18505e+06	1.0878e+06	1.09733e+06	1.10418e+06	1.13072e+06	1.0818e+06	1.15334e+06	1.18398e+06	1.10997e+06	1.11177e+06	1.3139e+06	1.19104e+06	1.0782e+06
DL-Phenylalanine	C9 H11 N O2	165.079	1.951	1.52857e+07	4.69527e+06	3.81454e+06	3.49516e+06	4.15474e+06	4.1044e+06	4.22037e+06	2.47006e+06	2.31586e+06	2.38138e+06	2.35504e+06	2.39715e+06	2.57217e+06	1.46496e+07	1.52259e+07	1.58537e+07	1.58017e+07	1.56971e+07	1.40586e+07	2.36883e+06	2.53767e+06	2.56845e+06	1.99689e+06	2.75692e+06	2.66834e+06	3.20033e+06	3.53888e+06	3.08977e+06	3.76828e+06	3.53363e+06	3.35139e+06	4.36289e+06	4.83217e+06	4.2746e+06	4.95617e+06	4.30476e+06	4.79148e+06	4.90651e+06	4.26022e+06	5.31276e+06	5.18262e+06	4.22777e+06	4.96904e+06
D-PANTOTHENIC ACID	C9 H17 N O5	219.11	4.237	3.00759e+06	273448	366633	568618	355948	330809	381770	232701	253526	206693	392016	219674	208864	2.84652e+06	2.94138e+06	2.79714e+06	2.61677e+06	3.2122e+06	2.95843e+06	349491	377492	348502	367444	321834	411866	435749	322453	372596	316664	331746	304041	303941	306467	298341	298254	298792	323912	1.34819e+06	967545	1.18783e+06	1.16072e+06	1.23152e+06	1.16361e+06
Formylkynurenine	C11 H12 N2 O4	236.079	1.516	105371	14717.1	13261.4	11751.5	15629.1	14914.1	13076.2	16879.3	16582	18986.2	19806.2	17292.4	18119.6	101273	94523.8	98913.2	107082	95242.6	108382	10439	9614.27	9379.01	6803.56	9790.1	12133.6	11282.8	12375.2	11631	11845.9	12446.2	12800.3	8499.69	11357.9	10614.7	9464.57	9645.32	10582.1	28212.5	25956.5	23351.6	25343.9	25968	27305.1
gamma-L-glutamyl-L-tyrosine	C14 H18 N2 O6	310.115	4.206	353673	270012	269244	263230	254566	381850	271094	144729	182278	191689	186524	196465	171090	203028	212169	247143	250900	228366	226476	307954	293468	290530	315357	418872	323256	281057	246564	242988	233238	250696	262331	251909	310020	295816	282727	319315	318978	339955	200180	231682	212995	309469	296265
Glycerol 3-phosphate	C3 H9 O6 P	172.013	1.347	239163	205589	270961	208396	243829	204585	222642	145476	171326	156162	164868	170925	180853	181830	206730	188840	207808	203884	207243	242551	195538	236446	243199	324470	212476	238190	231522	219363	232200	231863	247086	150310	174520	182583	168262	166742	161230	158609	218496	205797	164124	160557	198850
Glycerophosphoglycerol	C6 H15 O8 P	246.05	1.359	1.51489e+06	2.4496e+06	1.76956e+06	1.35124e+06	1.49768e+06	1.79582e+06	1.84032e+06	1.12493e+06	1.37091e+06	1.3091e+06	1.34237e+06	995566	1.21092e+06	502547	543589	499288	626676	549961	498035	1.82312e+06	1.71247e+06	1.83123e+06	1.59253e+06	1.87326e+06	1.79699e+06	1.70288e+06	1.72488e+06	1.74135e+06	1.58723e+06	1.72395e+06	1.91498e+06	942741	990420	1.13165e+06	843905	889774	1.02214e+06	851701	1.1026e+06	1.07793e+06	885776	939476	980953
Glycylprolylhydroxyproline	C12 H19 N3 O5	285.132	2.083	3.84603e+06	505561	475703	455518	529195	487336	489156	240970	272848	256088	239665	257817	317501	3.76772e+06	3.70615e+06	3.51229e+06	3.40334e+06	3.92436e+06	3.57542e+06	221907	203846	212411	205366	223241	204728	302104	295675	279601	298216	309100	332164	135902	117718	147422	149017	136261	126928	1.05847e+06	1.10762e+06	982582	1.09967e+06	992947	1.08733e+06
Gly-Leu	C8 H16 N2 O3	188.116	0.947	3.61597e+06	152644	116031	114567	165106	149142	125529	81030.1	103669	78915.4	83331.8	104120	90086.3	3.44763e+06	2.88515e+06	3.80554e+06	3.77174e+06	3.43414e+06	3.25209e+06	72074.3	65162.1	78531.2	73288	65671.5	75954.3	99984.8	109846	84743.1	95530.1	107988	106428	93578	85716.5	106560	100497	69083.8	88277.3	1.09794e+06	848618	1.02666e+06	795215	782043	1.23002e+06
Gly-l-pro	C7 H12 N2 O3	172.085	0.858	1.05252e+06	490530	468725	465561	480234	542786	420716	323861	553939	299723	632515	357627	347674	1.15692e+06	897549	846582	878663	1.04742e+06	908340	673854	420736	441509	356739	446025	403900	441191	476881	522440	464139	610417	574439	375490	434468	419224	415389	411000	353332	502016	561027	565601	504662	520079	535059
Guanine	C5 H5 N5 O	151.049	1.86	848933	416260	451069	484636	462043	426242	495865	214574	160502	178415	198386	181504	152987	773804	884994	754712	732623	750823	725659	544012	680939	647695	499493	488645	652649	375351	324712	370864	465065	437113	402953	382130	417250	358188	368862	384366	358473	396567	360439	339151	425203	355466	442984
Hexadecanamide	C16 H33 N O	255.256	12.861	739019	946456	807465	825064	899366	749925	910593	735964	843357	709572	726566	884595	735977	690041	712407	667185	710145	665140	732686	543054	534568	554397	509344	525595	598817	677460	526529	525336	540026	496797	499149	610469	792262	723991	755532	514835	582848	571907	696510	628532	649031	597797	613388
Hexadecasphinganine	C16 H35 N O2	273.266	6.936	1.83799e+08	2.85186e+06	3.4272e+06	2.85544e+06	3.19146e+06	3.12798e+06	2.90366e+06	1.04217e+07	1.07422e+07	9.88648e+06	1.00404e+07	9.92999e+06	1.04062e+07	1.75856e+08	1.78718e+08	1.72936e+08	1.77958e+08	1.71649e+08	1.76389e+08	1.22596e+06	1.10346e+06	1.12016e+06	1.12538e+06	988443	957535	1.30593e+06	1.30792e+06	1.31803e+06	1.31712e+06	1.37193e+06	1.10843e+06	1.08819e+06	1.33384e+06	1.16116e+06	1.31991e+06	1.43472e+06	1.21305e+06	4.71613e+07	4.36955e+07	4.22597e+07	4.31268e+07	4.33931e+07	4.66164e+07
Hexyl cinnamaldehyde	C15 H20 O	216.151	7.332	593974	382857	402227	391016	420838	405035	394151	287449	309375	290581	288287	285452	311160	592856	617908	549742	596268	609373	553637	564416	572443	601671	524819	593319	592433	460065	488476	518814	535619	491731	492606	473678	500295	516620	489884	485036	515407	424604	420155	416419	409857	436101	409944
Homocysteine thiolactone	C4 H7 N O S	117.025	1.95	6.27079e+06	3.69473e+06	3.54765e+06	3.20294e+06	3.72917e+06	3.37406e+06	3.24862e+06	7.00054e+06	6.77822e+06	6.40347e+06	7.28135e+06	7.17115e+06	7.0797e+06	271536	272227	250135	221967	308259	278799	4.67788e+06	5.41183e+06	5.37758e+06	4.44839e+06	5.7073e+06	6.26034e+06	5.46944e+06	5.17085e+06	6.2257e+06	6.53946e+06	5.63418e+06	5.20387e+06	3.97573e+06	4.14202e+06	2.97864e+06	4.37566e+06	3.99016e+06	4.13688e+06	3.65594e+06	3.00477e+06	3.74517e+06	3.23475e+06	3.60564e+06	3.69109e+06
Indole	C8 H7 N	117.058	4.227	3.76599e+06	200679	203751	201670	195493	179815	207884	284204	238321	268237	277259	278953	278610	3.66223e+06	3.86907e+06	3.86469e+06	3.88305e+06	3.87557e+06	3.95264e+06	162867	172616	154254	171168	158362	227794	203872	205093	230391	238151	215460	215859	183308	177484	199717	193762	177341	190795	853863	832709	871537	853563	860453	830001
Indole-3-acetic acid	C10 H9 N O2	175.063	5.096	103381	49013.8	49526.2	51858.8	50062.2	48313.6	48465.4	20259.5	25886.1	19772.6	16707.8	17212.7	21716.5	73568.5	80738.3	74017.7	68324.1	78730	102113	52437.8	53725.6	51897.9	52887.2	51986.8	50321.3	46927.7	49592.3	55259.3	60401.9	49802.4	42441.2	52113.9	49239	54401.1	43528.4	46190.8	54048.3	36083.7	44968	37167.7	49112.2	37609	45102.4
Indoleacetylaspartate	C14 H14 N2 O5	290.09	5.393	821924	313765	300845	339338	350171	323935	319414	652377	653265	635869	722144	681416	622241	196551	182674	185268	191010	182395	197013	653855	700870	687446	704652	693149	807474	1.05416e+06	1.0288e+06	1.01981e+06	1.00641e+06	900993	1.0689e+06	542167	624109	545950	564745	525429	535135	512405	386402	457420	447038	438011	473906
Kaempferol	C15 H10 O6	286.047	5.291	4.48469e+06	4.8418e+06	4.32032e+06	4.78566e+06	4.5826e+06	4.95212e+06	4.82411e+06	5.19431e+06	4.73657e+06	4.90032e+06	4.70396e+06	4.97803e+06	4.78901e+06	3.33033e+06	3.33441e+06	3.21952e+06	3.23858e+06	3.00242e+06	3.57286e+06	4.57401e+06	4.73989e+06	4.83955e+06	4.66703e+06	4.67504e+06	4.8215e+06	5.08702e+06	5.82558e+06	5.10044e+06	5.60302e+06	5.20412e+06	5.81023e+06	5.27121e+06	5.27939e+06	4.91939e+06	5.42579e+06	5.02385e+06	5.28533e+06	4.7249e+06	3.48055e+06	4.20905e+06	3.53469e+06	4.31956e+06	4.27381e+06
Kaempferol-3-O-β-glucopyranosyl-7-O-α-rhamnopyranoside	C27 H30 O15	594.158	4.867	1.45521e+06	1.17344e+06	1.20594e+06	1.38663e+06	1.39493e+06	1.19385e+06	1.37509e+06	1.08107e+06	1.2299e+06	1.14778e+06	1.41653e+06	1.17372e+06	1.32898e+06	1.0693e+06	1.07148e+06	1.10501e+06	996981	1.10265e+06	1.02964e+06	1.66982e+06	1.76512e+06	1.65596e+06	1.81443e+06	1.74476e+06	1.62147e+06	1.85842e+06	1.53287e+06	1.713e+06	1.88597e+06	1.66486e+06	1.63723e+06	1.52194e+06	1.51147e+06	1.57653e+06	1.51541e+06	1.6818e+06	1.68017e+06	957328	1.39164e+06	1.26979e+06	1.41437e+06	1.07721e+06	1.10523e+06
L-(-)-Asparagine	C4 H8 N2 O3	132.053	0.794	2.27947e+07	2.25173e+07	2.32627e+07	2.24845e+07	2.15249e+07	2.33132e+07	2.41132e+07	2.21283e+07	2.08286e+07	2.04747e+07	1.99025e+07	2.05529e+07	2.05493e+07	1.51639e+07	1.34383e+07	1.28479e+07	1.32417e+07	1.46152e+07	1.39965e+07	2.35081e+07	2.37552e+07	2.81318e+07	2.29383e+07	2.31694e+07	2.54008e+07	2.33263e+07	2.21713e+07	2.53083e+07	2.45453e+07	2.42159e+07	2.3887e+07	2.97706e+07	3.02856e+07	2.79571e+07	3.26571e+07	2.76395e+07	3.20208e+07	2.08878e+07	2.03982e+07	2.07675e+07	1.82158e+07	1.78749e+07	2.26737e+07
L-(-)-methionine	C5 H11 N O2 S	149.051	1.063	1.14131e+06	332926	397442	443901	419473	420214	378065	489086	362411	593422	423091	461657	348149	1.1007e+06	1.15054e+06	1.17583e+06	1.12305e+06	1.10489e+06	1.15756e+06	572889	485698	577111	572033	516194	541149	799085	593480	716502	743841	780793	621909	311748	345516	262445	323815	302918	307287	508302	575157	607671	534515	483314	571517
L-(-)-Serine	C3 H7 N O3	105.042	0.801	8.0668e+07	8.48343e+07	8.39669e+07	8.02003e+07	7.45944e+07	8.47761e+07	8.3101e+07	9.85082e+07	8.69459e+07	8.66753e+07	9.44093e+07	9.22896e+07	9.61284e+07	4.79037e+07	4.38129e+07	4.00725e+07	4.13289e+07	4.62989e+07	4.58313e+07	5.30627e+07	5.48446e+07	5.98433e+07	5.54043e+07	5.44677e+07	6.37818e+07	9.36213e+07	1.02339e+08	9.60776e+07	9.15447e+07	8.882e+07	9.04547e+07	7.46816e+07	7.34307e+07	7.15957e+07	7.90292e+07	7.4756e+07	8.1027e+07	7.60915e+07	6.21686e+07	6.50329e+07	6.5483e+07	6.49094e+07	7.23569e+07
L-(-)-Threonine	C4 H9 N O3	119.058	0.811	1.31863e+07	9.41335e+06	8.92756e+06	8.65854e+06	8.54802e+06	9.55967e+06	8.56664e+06	6.68403e+06	6.32374e+06	6.05329e+06	6.23161e+06	5.72947e+06	6.20655e+06	1.35113e+07	1.3508e+07	1.2492e+07	1.40139e+07	1.41212e+07	1.35844e+07	5.04277e+06	4.95156e+06	4.95449e+06	4.7176e+06	4.68877e+06	5.82998e+06	6.16702e+06	5.90217e+06	5.7946e+06	5.97956e+06	5.63405e+06	5.48031e+06	5.80482e+06	5.67617e+06	5.23817e+06	5.92736e+06	5.66422e+06	5.97628e+06	7.73682e+06	7.26365e+06	6.87718e+06	7.07331e+06	7.21396e+06	7.53145e+06
L-(+)-Arginine	C6 H14 N4 O2	174.111	0.759	7.69253e+07	8.00844e+07	8.21788e+07	8.2157e+07	8.37594e+07	7.77696e+07	8.64824e+07	6.42637e+07	9.14048e+07	5.85001e+07	6.61713e+07	6.62184e+07	6.22731e+07	3.42761e+07	3.36607e+07	2.90938e+07	3.02509e+07	3.47036e+07	3.58451e+07	1.01802e+08	1.10947e+08	1.07415e+08	9.757e+07	1.0569e+08	1.05362e+08	8.74956e+07	9.4116e+07	1.02002e+08	9.6984e+07	9.36843e+07	8.9819e+07	1.03685e+08	1.03446e+08	9.92918e+07	1.03471e+08	1.10427e+08	1.03178e+08	7.14275e+07	7.59274e+07	7.14956e+07	7.56118e+07	7.58066e+07	6.92624e+07
L-(+)-Aspartic acid	C4 H7 N O4	133.037	0.848	7.82809e+06	1.11545e+07	1.21463e+07	1.17573e+07	1.15206e+07	1.11062e+07	1.28896e+07	8.76397e+06	8.79188e+06	8.33718e+06	8.67928e+06	8.33937e+06	8.68995e+06	6.65346e+06	6.54109e+06	6.55254e+06	6.45093e+06	6.91807e+06	6.84333e+06	8.08848e+06	8.44152e+06	8.24799e+06	7.86606e+06	8.00577e+06	8.75737e+06	6.99062e+06	6.68349e+06	7.39328e+06	7.61017e+06	7.45806e+06	7.85376e+06	7.17957e+06	6.67195e+06	6.57064e+06	6.75284e+06	7.11378e+06	6.98553e+06	7.63583e+06	7.25657e+06	7.33639e+06	7.19618e+06	7.19859e+06	7.5754e+06
L-(+)-Leucine	C6 H13 N O2	131.095	1.26	1.3073e+07	7.76706e+06	7.41677e+06	7.6397e+06	7.4898e+06	8.60913e+06	7.87633e+06	4.94756e+06	5.32181e+06	5.66248e+06	5.2102e+06	5.37954e+06	5.16927e+06	1.26699e+07	1.29023e+07	1.29228e+07	1.31865e+07	1.33456e+07	1.28784e+07	5.55979e+06	5.60122e+06	5.9973e+06	6.02417e+06	6.60137e+06	6.38636e+06	9.48919e+06	9.94306e+06	9.24832e+06	9.90845e+06	1.05349e+07	1.01528e+07	8.42013e+06	8.64485e+06	9.42878e+06	9.01068e+06	8.74322e+06	9.29947e+06	7.35354e+06	8.33567e+06	8.13263e+06	8.12216e+06	7.40128e+06	7.79655e+06
L-(+)-Valine	C5 H11 N O2	117.079	0.939	1.13722e+07	5.26009e+06	5.07148e+06	4.5587e+06	5.12017e+06	5.44987e+06	5.01631e+06	3.02219e+06	3.35087e+06	2.90553e+06	3.03219e+06	3.08274e+06	3.39263e+06	9.28475e+06	9.07107e+06	1.06094e+07	1.10778e+07	9.47424e+06	9.57142e+06	3.88427e+06	4.00843e+06	3.58903e+06	4.40303e+06	4.1523e+06	4.06536e+06	5.80678e+06	6.0899e+06	5.93252e+06	5.67285e+06	6.06731e+06	5.58847e+06	5.21344e+06	5.22491e+06	5.80965e+06	5.68897e+06	5.77256e+06	6.15255e+06	4.57895e+06	5.81179e+06	5.88607e+06	5.12335e+06	4.34552e+06	5.49189e+06
L-alpha-Aspartyl-L-phenylalanine	C13 H16 N2 O5	280.106	4.218	135365	3330.19	18270.7	4915.39	2834.39	20861.4	21082.3	12551.3	12177.9	15047.7	12677	11535.7	17365.5	111477	124604	113468	91921	133341	112583	18293.1	19116.2	20489.5	18882.3	23546.1	20435.8	3443.58	12786	16075.2	14609.3	13989.4	3973.11	2767	2726.45	16463	14814.6	13550.3	13051.5	49420.9	47401.6	50139	52634.5	59080.2	39857.9
L-alpha-Glycerylphosphorylcholine	C8 H20 N O6 P	257.102	0.844	2.44397e+07	3.31629e+07	3.30463e+07	3.06457e+07	3.17918e+07	3.07333e+07	3.4748e+07	2.80831e+07	2.85713e+07	2.49939e+07	2.82519e+07	2.74138e+07	2.75482e+07	4.44581e+06	4.31476e+06	4.30559e+06	4.43301e+06	4.54431e+06	4.68481e+06	2.68176e+07	2.94386e+07	2.70201e+07	2.77419e+07	2.79869e+07	2.90075e+07	2.9154e+07	2.6983e+07	2.81916e+07	2.82997e+07	2.80819e+07	3.06826e+07	2.77724e+07	2.67827e+07	2.73862e+07	2.64857e+07	2.90093e+07	2.93201e+07	2.09381e+07	2.17957e+07	2.11582e+07	2.08153e+07	2.22257e+07	2.04919e+07
Leu-Leu	C12 H24 N2 O3	244.179	4.685	69352.2	30240.8	29436.7	30873.5	28230	29966.3	32623.2	59296.7	60645.1	60061.6	75274.5	54254.2	60226.5	58702.3	66681.2	62243.9	64217.2	62547.3	64460	41835.9	47088.2	46103.9	54163.4	55656.6	54251.5	30144.4	25126.4	29161.8	29304.5	32510.2	31731.2	45101.3	49925	56812.1	58698	47160.5	52417.8	32198.6	31334.7	44501.8	30695.6	22080.3	42599.8
Leu-pro	C11 H20 N2 O3	228.147	5.537	486062	3387.08	4520.16	7484.17	7627.92	8501.86	3024.53	7713.82	21937.1	11136.5	27379.5	17117.8	15890.5	439982	453811	445110	419754	441464	488794	13828.5	3408.93	6582.33	2471.44	3851.97	2575.52	6889.25	3047.5	4218.72	8900.25	6807.18	5149.29	6986.7	3412.95	2693.2	3307.56	14238.4	5370.05	88772.1	96146.3	83393.7	118071	89952.3	101886
L-Glutathione oxidized	C20 H32 N6 O12 S2	612.151	1.314	2.93782e+06	2.54087e+06	2.89134e+06	2.16546e+06	2.36896e+06	2.79325e+06	4.06338e+06	2.12038e+06	2.777e+06	3.23933e+06	4.21216e+06	3.12255e+06	3.02196e+06	2.56111e+06	1.93358e+06	2.07313e+06	2.33007e+06	2.42738e+06	2.38453e+06	1.38463e+06	1.64725e+06	1.64263e+06	1.21177e+06	1.21544e+06	1.72628e+06	1.18783e+06	1.01678e+06	1.27969e+06	1.18185e+06	935783	1.22354e+06	1.01272e+06	1.01026e+06	809887	977205	1.13562e+06	1.14142e+06	1.27368e+06	1.48646e+06	1.60969e+06	1.78782e+06	951205	1.56998e+06
L-Phenylalanine	C9 H11 N O2	165.079	2.571	6.82535e+06	1.21062e+06	1.56534e+06	1.11517e+06	1.23236e+06	1.0445e+06	1.56441e+06	1.36883e+06	928131	992591	1.08717e+06	970284	1.33611e+06	5.80754e+06	6.4824e+06	5.13543e+06	4.02123e+06	6.87202e+06	5.25119e+06	1.11982e+06	1.40013e+06	810575	1.31839e+06	942798	1.09859e+06	1.28988e+06	1.39644e+06	1.58156e+06	1.37817e+06	2.15222e+06	1.43021e+06	1.56106e+06	586226	980145	1.23735e+06	1.10562e+06	1.16117e+06	2.0329e+06	1.70186e+06	1.75676e+06	1.84322e+06	1.98663e+06	1.81852e+06
L-Proline	C5 H9 N O2	115.063	0.861	2.46746e+07	8.72366e+06	8.63e+06	9.72534e+06	9.19686e+06	8.21259e+06	8.42857e+06	6.70859e+06	7.92953e+06	7.52541e+06	7.12667e+06	6.73597e+06	7.70397e+06	7.20236e+06	6.61327e+06	1.58034e+07	6.76369e+06	6.88221e+06	6.93006e+06	9.17953e+06	8.62234e+06	8.90912e+06	9.25789e+06	9.40736e+06	1.00329e+07	9.58144e+06	9.40121e+06	9.49693e+06	1.00841e+07	9.58863e+06	3.15768e+07	7.44973e+06	7.60361e+06	7.64341e+06	7.76542e+06	7.90567e+06	7.56359e+06	8.37968e+06	7.01833e+06	6.95761e+06	8.14183e+06	6.92836e+06	7.1115e+06
L-Pyroglutamic acid	C5 H7 N O3	129.042	0.801	1.14406e+08	1.22874e+08	1.16643e+08	1.13824e+08	1.05554e+08	1.18241e+08	1.2396e+08	1.49155e+08	1.31282e+08	1.31562e+08	1.3916e+08	1.3587e+08	1.40635e+08	6.69491e+07	6.21459e+07	5.73643e+07	5.81227e+07	6.55215e+07	6.24644e+07	7.14942e+07	7.73336e+07	7.94632e+07	7.4593e+07	7.46295e+07	8.88675e+07	1.32406e+08	1.40454e+08	1.42663e+08	1.30935e+08	1.27664e+08	1.28102e+08	1.0147e+08	9.87913e+07	9.19447e+07	1.05849e+08	9.88259e+07	1.08423e+08	1.04598e+08	8.88621e+07	8.09002e+07	9.19719e+07	8.99243e+07	9.83448e+07
L-Theanine	C7 H14 N2 O3	174.1	0.883	1.25494e+07	4.83494e+06	4.60176e+06	4.42073e+06	5.13683e+06	5.08571e+06	4.56888e+06	4.49643e+06	5.80038e+06	5.52716e+06	4.59677e+06	4.91427e+06	5.80427e+06	1.27371e+07	1.16802e+07	1.21675e+07	1.14886e+07	1.35925e+07	1.28158e+07	4.72991e+06	3.80928e+06	4.30379e+06	4.58007e+06	5.02317e+06	4.44767e+06	6.19697e+06	6.48122e+06	5.32147e+06	5.67245e+06	6.2216e+06	6.44741e+06	4.43171e+06	3.7344e+06	4.20466e+06	3.47074e+06	3.78512e+06	3.59305e+06	6.82036e+06	6.86529e+06	7.57656e+06	6.32785e+06	6.41164e+06	7.22869e+06
Methyl alpha-aspartylphenylalaninate	C14 H18 N2 O5	294.121	4.819	394285	227495	238309	224841	209098	215675	221434	196919	195066	191731	183158	171098	205308	365845	298337	352098	339598	418246	367446	143616	160903	166757	165519	183763	164029	186353	169343	177850	183986	175831	146141	156305	166353	171356	179559	150560	162449	216602	169285	173302	187413	189143	196049
Methyl Jasmonate	C13 H20 O3	224.141	5.054	1.00355e+06	1.22492e+06	1.24641e+06	1.22092e+06	1.25277e+06	1.31036e+06	1.24592e+06	1.14924e+06	1.2518e+06	1.19098e+06	1.35388e+06	1.34302e+06	1.30348e+06	918150	784973	922530	801761	941419	892058	749730	778375	708759	685014	755619	749296	1.07688e+06	1.08773e+06	1.11759e+06	992679	1.19439e+06	1.09154e+06	1.12022e+06	1.15627e+06	1.11945e+06	1.07454e+06	1.10716e+06	1.13104e+06	894836	792802	774313	935882	730284	882335
monomethyl phosphate	C H5 O4 P	111.993	1.374	4.36911e+06	5.63059e+06	5.80118e+06	5.71114e+06	5.68916e+06	5.31082e+06	5.97712e+06	3.46771e+06	2.75661e+06	1.77878e+06	2.0875e+06	3.68305e+06	2.29603e+06	4.00161e+06	2.83165e+06	3.94901e+06	3.66196e+06	4.24749e+06	3.98938e+06	6.23475e+06	6.91092e+06	6.5173e+06	6.31469e+06	6.17043e+06	6.87576e+06	4.92536e+06	4.68209e+06	5.45207e+06	5.01223e+06	5.09729e+06	5.13705e+06	4.32103e+06	5.13148e+06	2.03672e+06	5.48921e+06	2.11152e+06	4.31709e+06	3.38762e+06	3.35381e+06	3.57322e+06	3.75627e+06	3.62469e+06	3.04029e+06
N-Acetyl-L-histidine	C8 H11 N3 O3	197.08	1.022	94789.8	3460.38	127527	5099.15	3722.76	144291	113870	1240.74	68008	1236.2	84011	92829.1	3851.81	1519.46	996.795	1067.39	1036.94	2397.52	1752.37	1595.88	119885	1612.1	4357.09	8628.55	133785	4718.22	129698	113146	122052	1450.4	1514.35	69669.4	2428.31	1633.28	91741.8	90307.3	2501.5	14973.7	82939.9	79304.1	75313.8	6391.86	83498.3
pentahomomethionine	C10 H21 N O2 S	219.129	5.224	918921	46927.7	32979.3	35838.4	41223.5	41983.8	37302.8	27594.7	26663.2	26007.3	39669.6	40722.9	37955.5	906887	933226	904375	925273	937123	892570	77389.8	79340.8	77567	84345.4	87106.7	95096.7	84359.6	88902.2	79218.4	94373.8	89811.9	90947.5	78925.7	67254	82258.7	87035.6	70641.2	74804	239268	235675	291910	264978	220654	250757
Phosphatidylserine	C13 H24 N O10 P	385.113	4.965	1.27481e+06	1.23827e+06	1.11511e+06	1.15049e+06	1.04168e+06	1.12585e+06	1.18885e+06	986591	797252	1.09214e+06	962996	991545	938802	310867	308528	299841	281596	265360	289838	1.69366e+06	1.53011e+06	1.77748e+06	1.86251e+06	1.65855e+06	1.5925e+06	1.56085e+06	1.51523e+06	1.65152e+06	1.21276e+06	1.534e+06	1.35458e+06	1.5077e+06	1.37955e+06	1.7567e+06	1.36725e+06	1.52204e+06	1.80002e+06	989573	1.04531e+06	832996	1.07894e+06	1.04897e+06	921443
Pyridoxal	C8 H9 N O3	167.058	0.944	469685	38334.9	508546	527641	37224.3	43560.8	533265	335912	43269.8	350631	302802	296455	16618.6	224779	232146	69786.9	79780.8	235512	248491	743701	614163	731821	57883.4	50006.7	746206	43866.6	22347.8	544562	536006	39552.4	39272.1	607503	648476	87759.1	604014	562292	569991	273347	17250.2	43748.6	276987	262455	60509
Reduced Glutathione	C10 H17 N3 O6 S	307.083	5.238	105493	164817	170041	150132	135108	163749	153162	98910.5	89817.4	100146	106465	100719	93446.1	80939.2	81409	80101.3	80161	90158.4	86177.8	95566.2	107944	96497.9	103750	101861	110799	95974.3	90659.5	95898.9	111158	88951.2	95245.4	72111.3	85164.3	80730.3	81082.1	83694.3	81802.7	87500.1	101022	50132	98839.6	78733.1	89697.8
Salicylic acid	C7 H6 O3	138.032	4.726	1.76909e+06	385816	417469	382477	406985	378353	417425	283233	302088	228863	258683	240468	257541	1.67422e+06	1.68143e+06	1.66171e+06	1.54574e+06	1.79159e+06	1.80902e+06	195329	190133	187213	187211	169518	189773	205025	214763	196182	219389	209212	213333	200955	189949	192331	195922	185503	188001	604681	531620	597606	650099	533559	582919
S-methyl D-thioglycerate	C4 H8 O3 S	136.019	1.184	3.7674e+06	161736	147569	158905	179947	172514	171447	93712.4	103488	87124.8	91042.2	100085	95192.1	3.06108e+06	3.33967e+06	3.58182e+06	3.85544e+06	3.64495e+06	3.07273e+06	98094.2	89569.5	100379	112713	112991	98386.3	101954	103354	96816	109629	110244	103269	49468.9	44627	47204.3	47507	46313.6	52578.4	1.00231e+06	898057	894733	907114	848078	1.0101e+06
trans-3-Indoleacrylic acid	C11 H9 N O2	187.063	4.226	7.10187e+07	3.71148e+06	3.81206e+06	3.82673e+06	3.98815e+06	3.82544e+06	3.85569e+06	4.96042e+06	4.74849e+06	4.7195e+06	4.88794e+06	5.04575e+06	5.09192e+06	6.93632e+07	7.13566e+07	6.9413e+07	7.34085e+07	7.06084e+07	7.21425e+07	3.25135e+06	3.37117e+06	3.35191e+06	3.32464e+06	3.33528e+06	3.60631e+06	4.16808e+06	4.08436e+06	4.43437e+06	4.27121e+06	4.20099e+06	4.15244e+06	3.52186e+06	3.52248e+06	3.52388e+06	3.54082e+06	3.45237e+06	3.6729e+06	1.69974e+07	1.5798e+07	1.6771e+07	1.63322e+07	1.7196e+07	1.59899e+07
Tris(hydroxymethyl)aminomethane	C4 H11 N O3	121.074	0.764	3.45067e+06	1.13617e+06	1.1497e+06	1.07225e+06	1.15772e+06	1.01901e+06	1.22337e+06	5.07979e+06	4.04622e+06	4.04778e+06	4.20848e+06	4.02959e+06	3.70163e+06	1.07247e+06	939943	1.07359e+06	1.17365e+06	1.09189e+06	1.0007e+06	2.3772e+06	2.33452e+06	2.35012e+06	1.83856e+06	1.88464e+06	2.05224e+06	1.07813e+06	1.2635e+06	1.17598e+06	1.15808e+06	1.15497e+06	1.09859e+06	1.48368e+06	1.38624e+06	1.41521e+06	1.37722e+06	1.36902e+06	1.25696e+06	1.28726e+06	1.35854e+06	1.60448e+06	1.72689e+06	1.57528e+06	1.17167e+06
Tyr-Phe	C18 H20 N2 O4	328.142	7.134	1.33782e+06	92675.6	94159.3	88717.3	89210	88027.2	87289.4	1.30946e+06	1.29065e+06	1.31488e+06	1.25399e+06	1.28894e+06	1.28798e+06	516255	505647	497805	505356	503008	467041	71872.6	74260.7	64942.2	68106.1	75398.9	63220.2	165319	155988	165318	171127	170765	185026	693496	660035	716429	700743	677682	719623	436474	390125	376396	383354	388446	449802
UDP-GlcNAc	C17 H27 N3 O17 P2	607.081	4.589	131282	78950.2	81969	83223.2	89590.3	78060.1	87735.7	71557.2	66790.7	66448.4	66820.7	62408.2	72293.2	136038	125793	137858	117544	129879	121328	74727.3	71528.7	68134.4	70392.3	69483.7	78330.2	71792	78748.7	75951.1	66995.1	70193.8	75046.8	60093.2	58664.5	57369.9	62625.1	53890.5	58552.8	74128.2	66035.9	72564.1	71117.1	74293.4	68379
uridine 5′-diphosphate	C9 H14 N2 O12 P2	404.001	4.493	2.32888e+06	3.09004e+06	3.08911e+06	3.11829e+06	3.29171e+06	3.31772e+06	3.32894e+06	2.5227e+06	2.46453e+06	2.34817e+06	2.38282e+06	2.43144e+06	2.57025e+06	1.50769e+06	1.38799e+06	1.46158e+06	1.4874e+06	1.53715e+06	1.56605e+06	3.09623e+06	3.30285e+06	3.07817e+06	2.9659e+06	3.12769e+06	3.3804e+06	3.00516e+06	2.98189e+06	2.91827e+06	3.00155e+06	2.88322e+06	3.05773e+06	2.42688e+06	2.39543e+06	2.40251e+06	2.48862e+06	2.48483e+06	2.55571e+06	2.1408e+06	2.03328e+06	2.12399e+06	1.99305e+06	2.09052e+06	2.09977e+06
Val-Ser	C8 H16 N2 O4	204.111	0.862	1.22889e+06	705167	669955	630050	646549	676801	566241	500790	735720	537651	670458	544002	453452	933997	390598	1.08457e+06	1.33538e+06	817569	680295	908247	606896	619001	627182	647574	657494	647851	634385	728504	644984	785872	676546	437440	559589	530999	479415	462932	516053	426944	479065	479869	520557	460279	437262
Valyl-4-hydroxyproline	C10 H18 N2 O4	230.126	1.198	355103	3569.12	3568.78	3632.53	3375.64	3554.05	3616.5	3081.52	3177.24	3147.79	3181.91	3003.52	3119.86	290658	341954	341754	361920	315088	312275	3100.84	3177.56	3145.45	2939.95	3068.52	2959.09	3449.03	3221.03	3157.45	3382.39	3623.75	3357.77	3128.58	2983.9	3002.35	3099.77	3276.17	3400.34	50727	48183.1	49672.6	45779.8	49228.2	50022.5
Vitamin A	C20 H30 O	286.229	6.084	123399	17549	31204.7	40448	37862.4	19110.9	22016.7	20475	26028.6	14591.9	29197.2	23829.2	16074.5	135188	110376	63158.9	113193	126202	51112.1	19613	11709.7	8379.26	16756.9	13741.9	5782.8	13282.7	13647.6	15079.2	18915.4	22438.8	21245.2	17101.4	11778	16033	14230.1	20322.6	15212.7	26688.5	26226.5	22591	27220	25448.1	36304.6
Vitamin C	C6 H8 O6	176.032	1.269	164670	231874	226508	212972	211887	202237	230630	165688	148489	170299	156432	166736	170051	97985.3	103960	101441	110916	108804	105276	158084	158019	142819	165692	194857	167311	214957	203805	193692	207042	218541	209026	171611	188371	178795	178625	201493	186726	147711	153356	150817	145277	147048	150199
α-Lactose	C12 H22 O11	342.115	0.917	3.98056e+06	5.30191e+06	5.64749e+06	5.00959e+06	5.77124e+06	5.67928e+06	6.45745e+06	3.99424e+06	4.42207e+06	4.10551e+06	4.23474e+06	4.08722e+06	4.33988e+06	1.66978e+06	1.61598e+06	1.80566e+06	1.71761e+06	1.72128e+06	1.57723e+06	3.69249e+06	4.01213e+06	3.3138e+06	3.26731e+06	3.5149e+06	4.16702e+06	3.53186e+06	4.01207e+06	3.36231e+06	2.83671e+06	3.61124e+06	3.55586e+06	2.67673e+06	2.79433e+06	3.18677e+06	3.08414e+06	2.80959e+06	3.15925e+06	2.97073e+06	3.61092e+06	3.56865e+06	3.40238e+06	3.06668e+06	3.3244e+06
