# Supplementary material for: Metabolomics analysis identifies metabolites associated with systemic acquired resistance in Arabidopsis
Source: PeerJ. 2020 Sep 30;8:e10047. doi: 10.7717/peerj.10047 (PMC7532762; doi:10.7717/peerj.10047)
Supplement: Table S2 [file peerj-08-10047-s002.xlsx]

## Sheet: DL-Avr vs SL-CK
Name	Formula	VIP	Molecular Weight	RT [min]	Area (Max.)	DL-CK-1	DL-CK-2	DL-CK-3	DL-CK-4	DL-CK-5	DL-CK-6	DL-Avr-1	DL-Avr-2	DL-Avr-3	DL-Avr-4	DL-Avr-5	DL-Avr-6	Average DL-CK	Average DL-Avr	FC DL-Avr/DL-CK	P value	P.adjust by FDR
(E)-p-coumaric acid	C9 H8 O3	2.43974	164.047	1.209	2.15675e+07	2.88938e+06	2.42058e+06	2.6478e+06	2.58581e+06	2.51353e+06	2.60684e+06	4.48739e+06	4.52029e+06	4.37684e+06	4.50341e+06	4.49005e+06	4.58957e+06	2.61066e+06	4.49459e+06	1.72163	1.23755e-10	1.39142e-09
6-Decylubiquinol	C19 H32 O4	5.36679	324.229	8.774	1.73383e+07	1.15642e+07	1.20349e+07	1.19077e+07	1.17986e+07	1.23856e+07	1.30161e+07	2.10628e+07	2.01145e+07	2.19253e+07	2.22963e+07	2.07545e+07	2.13253e+07	1.21178e+07	2.12465e+07	1.75332	4.1212e-10	3.10963e-09
Coumarone	C8 H6 O	1.24101	118.042	1.206	5.60468e+06	677154	647091	611246	616725	606176	609995	1.14992e+06	1.16501e+06	1.05935e+06	1.09112e+06	1.06517e+06	1.17135e+06	628064	1.11699e+06	1.77846	1.66014e-09	1.01208e-08
2,4-dihydroxyheptadec-16-ynyl acetate	C19 H34 O4	1.20429	326.245	9.428	1.23944e+06	1.13254e+06	1.10604e+06	1.04723e+06	1.09545e+06	1.01218e+06	1.13288e+06	1.54456e+06	1.5696e+06	1.52556e+06	1.61041e+06	1.49349e+06	1.55717e+06	1.08772e+06	1.55013e+06	1.42512	5.84338e-09	2.69445e-08
2′-Hydroxy-4,4′,6′-trimethoxychalcone	C18 H18 O5	1.01968	314.115	6.843	3.31748e+06	440939	406576	419882	425700	463392	486644	726751	762100	772100	835266	778125	765431	440522	773296	1.75541	7.26666e-09	3.08713e-08
2,6-di-tert-butyl-4-ethylphenol	C16 H26 O	1.01602	234.198	9.428	866786	780902	783966	729786	780377	740170	817864	1.13156e+06	1.13303e+06	1.06151e+06	1.09309e+06	1.06556e+06	1.12213e+06	772177	1.10115e+06	1.42603	7.43888e-09	3.08713e-08
2-Indolylformic acid	C9 H7 N O2	1.07597	161.048	5.117	4.15426e+06	322412	326654	326765	355671	313368	374422	635168	661559	745472	697253	750992	754059	336549	707417	2.10197	1.64329e-08	6.19968e-08
L-Pyroglutamic acid	C5 H7 N O3	13.2448	129.042	0.801	1.14406e+08	7.14942e+07	7.73336e+07	7.94632e+07	7.4593e+07	7.46295e+07	8.88675e+07	1.32406e+08	1.40454e+08	1.42663e+08	1.30935e+08	1.27664e+08	1.28102e+08	7.77302e+07	1.33704e+08	1.7201	2.4687e-08	8.26311e-08
DL-Glutamine	C5 H10 N2 O3	13.2462	146.069	0.801	1.14506e+08	7.16414e+07	7.7387e+07	7.95169e+07	7.4733e+07	7.47019e+07	8.90513e+07	1.32594e+08	1.40516e+08	1.4279e+08	1.3114e+08	1.27767e+08	1.28147e+08	7.78386e+07	1.33826e+08	1.71927	2.48889e-08	8.26311e-08
L-(+)-Leucine	C6 H13 N O2	3.45833	131.095	1.26	1.3073e+07	5.55979e+06	5.60122e+06	5.9973e+06	6.02417e+06	6.60137e+06	6.38636e+06	9.48919e+06	9.94306e+06	9.24832e+06	9.90845e+06	1.05349e+07	1.01528e+07	6.02837e+06	9.87945e+06	1.63883	3.02917e-08	9.67006e-08
L-(-)-Serine	C3 H7 N O3	10.7341	105.042	0.801	8.0668e+07	5.30627e+07	5.48446e+07	5.98433e+07	5.54043e+07	5.44677e+07	6.37818e+07	9.36213e+07	1.02339e+08	9.60776e+07	9.15447e+07	8.882e+07	9.04547e+07	5.69007e+07	9.38095e+07	1.64865	5.86496e-08	1.62264e-07
(9S,13S)-12-Oxophytodienoic acid	C18 H28 O3	2.6809	292.203	9.506	2.08706e+07	7.86529e+06	8.02475e+06	8.09106e+06	7.66286e+06	8.34197e+06	8.16979e+06	5.75859e+06	6.33894e+06	5.66631e+06	5.55495e+06	5.50203e+06	5.42182e+06	8.02595e+06	5.70711e+06	0.711081	7.15619e-08	1.91601e-07
1-alpha-linolenoyl-sn-glycerol	C21 H36 O4	1.32254	352.261	11.646	860404	478126	469028	375640	438711	509815	407006	1.00914e+06	1.03308e+06	1.11225e+06	1.0232e+06	1.0434e+06	837547	446388	1.00977e+06	2.26209	1.13843e-07	2.86333e-07
L-(+)-Valine	C5 H11 N O2	2.3912	117.079	0.939	1.13722e+07	3.88427e+06	4.00843e+06	3.58903e+06	4.40303e+06	4.1523e+06	4.06536e+06	5.80678e+06	6.0899e+06	5.93252e+06	5.67285e+06	6.06731e+06	5.58847e+06	4.01707e+06	5.85964e+06	1.45868	1.17333e-07	2.86431e-07
DL-Citrulline	C6 H13 N3 O3	4.81119	175.095	0.81	1.7598e+07	1.32832e+07	1.2774e+07	1.28925e+07	1.19005e+07	1.28386e+07	1.51911e+07	1.99561e+07	2.01105e+07	2.13872e+07	2.17818e+07	1.9599e+07	2.09523e+07	1.31467e+07	2.06311e+07	1.56931	1.30517e-07	3.09511e-07
2,3-Diacetoxyursa-12,18-dien-28-oic acid	C34 H50 O6	1.02685	554.36	10.37	634017	983532	973835	923122	862944	1.005e+06	942418	663274	546403	600442	638214	590981	610054	948475	608228	0.641269	1.58069e-07	3.64437e-07
3-O-beta-D-galactosyl-sn-glycerol	C9 H18 O8	1.29411	254.1	0.896	905599	987425	951671	933657	920728	1.18552e+06	1.00245e+06	442082	489019	370388	436837	497258	498688	996909	455712	0.457125	2.70921e-07	6.07743e-07
trans-3-Indoleacrylic acid	C11 H9 N O2	1.61485	187.063	4.226	7.10187e+07	3.25135e+06	3.37117e+06	3.35191e+06	3.32464e+06	3.33528e+06	3.60631e+06	4.16808e+06	4.08436e+06	4.43437e+06	4.27121e+06	4.20099e+06	4.15244e+06	3.37344e+06	4.21857e+06	1.25052	2.85045e-07	6.22599e-07
camalexin	C11 H8 N2 S	1.90541	200.041	6.858	1.19893e+08	5.95979e+06	6.07225e+06	6.12453e+06	6.17524e+06	6.19278e+06	6.39392e+06	4.7036e+06	4.76469e+06	5.08207e+06	5.09451e+06	5.06701e+06	5.15795e+06	6.15308e+06	4.9783e+06	0.809075	3.0555e-07	6.50274e-07
Methyl Jasmonate	C13 H20 O3	1.04631	224.141	5.054	1.00355e+06	749730	778375	708759	685014	755619	749296	1.07688e+06	1.08773e+06	1.11759e+06	992679	1.19439e+06	1.09154e+06	737799	1.09347e+06	1.48207	3.33401e-07	6.91807e-07
indol-3-ylmethyl-ascorbate	C15 H15 N O6	1.65509	305.089	5.396	2.35168e+06	1.74713e+06	1.9616e+06	1.96959e+06	1.9854e+06	1.70195e+06	1.8865e+06	2.689e+06	3.01518e+06	2.78343e+06	2.86177e+06	2.61972e+06	2.62752e+06	1.87536e+06	2.76611e+06	1.47497	6.0518e-07	1.18438e-06
1,2-di-O-sinapoyl-beta-D-glucose	C28 H32 O14	1.86272	592.178	5.75	2.48687e+06	1.26347e+06	1.48933e+06	1.48182e+06	1.67924e+06	1.32608e+06	1.40464e+06	2.83254e+06	2.48048e+06	2.54223e+06	2.93186e+06	2.33033e+06	2.3808e+06	1.44077e+06	2.58304e+06	1.79283	1.91447e-06	3.53114e-06
O1-Cinnamoyl-3-[3,5-bis(trifluoromethyl)phenyl]prop-2-enehydroximamide	C34 H34 N2 O12 P2	2.23779	724.159	5.317	4.6109e+06	5.45698e+06	5.46667e+06	6.22232e+06	5.67929e+06	5.93163e+06	5.84798e+06	4.05566e+06	3.94581e+06	3.93859e+06	4.20804e+06	4.67241e+06	3.90954e+06	5.76748e+06	4.12167e+06	0.714641	2.05499e-06	3.70792e-06
Sinapinic acid	C34 H27 N2 O5 P	1.84773	574.167	5.749	2.35263e+06	1.06668e+06	1.38391e+06	1.37862e+06	1.57273e+06	1.235e+06	1.28565e+06	2.61526e+06	2.38672e+06	2.45139e+06	2.82447e+06	2.22385e+06	2.19216e+06	1.32043e+06	2.44898e+06	1.85468	2.81524e-06	4.86802e-06
1-{[5-Methyl-2-(trifluoromethyl)-3-furyl]carbonyl}-4-piperidinecarboxylic acid	C6 H11 O6 P	1.3264	210.03	1.247	1.84427e+06	2.41685e+06	2.3192e+06	2.05063e+06	2.2891e+06	2.38119e+06	2.35935e+06	1.83704e+06	1.79203e+06	1.6529e+06	1.70654e+06	1.60726e+06	1.71214e+06	2.30272e+06	1.71799e+06	0.746068	3.59175e-06	6.08398e-06
monomethyl phosphate	C H5 O4 P	2.08265	111.993	1.374	4.36911e+06	6.23475e+06	6.91092e+06	6.5173e+06	6.31469e+06	6.17043e+06	6.87576e+06	4.92536e+06	4.68209e+06	5.45207e+06	5.01223e+06	5.09729e+06	5.13705e+06	6.50397e+06	5.05102e+06	0.776605	5.93114e-06	9.8457e-06
Adenine	C5 H5 N5	2.22011	135.054	1.292	2.48394e+06	2.5902e+06	3.10217e+06	3.11731e+06	2.38587e+06	2.37316e+06	3.67943e+06	1.17549e+06	1.00221e+06	1.57776e+06	1.12282e+06	1.24252e+06	1.00123e+06	2.87469e+06	1.187e+06	0.412915	2.30185e-05	3.29403e-05
Adenosine	C10 H13 N5 O4	5.88848	267.096	1.291	1.52305e+07	1.70362e+07	2.13798e+07	2.10694e+07	1.51317e+07	1.5987e+07	2.5646e+07	6.94164e+06	6.61992e+06	9.59094e+06	7.93019e+06	6.85267e+06	6.45755e+06	1.9375e+07	7.39882e+06	0.381874	3.79556e-05	5.18806e-05
4-Oxo-4-(1H-purin-6-ylamino)butanoic acid	C9 H9 N5 O3	5.88256	235.07	1.296	1.52305e+07	1.70362e+07	2.13798e+07	2.10694e+07	1.51317e+07	1.5987e+07	2.5646e+07	6.94164e+06	6.75114e+06	9.59094e+06	7.93019e+06	6.85267e+06	6.45755e+06	1.9375e+07	7.42069e+06	0.383003	3.81965e-05	5.18806e-05
Cumene	C9 H12	1.02523	120.094	5.921	1.3682e+06	1.97271e+06	1.83507e+06	1.92709e+06	1.80252e+06	1.84169e+06	2.12599e+06	1.50922e+06	1.51697e+06	1.57031e+06	1.61463e+06	1.58744e+06	1.54124e+06	1.91751e+06	1.55663e+06	0.811799	3.95583e-05	5.21165e-05
L-Theanine	C7 H14 N2 O3	2.10948	174.1	0.883	1.25494e+07	4.72991e+06	3.80928e+06	4.30379e+06	4.58007e+06	5.02317e+06	4.44767e+06	6.19697e+06	6.48122e+06	5.32147e+06	5.67245e+06	6.2216e+06	6.44741e+06	4.48232e+06	6.05686e+06	1.35128	9.77935e-05	0.000122983
DL-Phenylalanine	C9 H11 N O2	1.61655	165.079	1.951	1.52857e+07	2.36883e+06	2.53767e+06	2.56845e+06	1.99689e+06	2.75692e+06	2.66834e+06	3.20033e+06	3.53888e+06	3.08977e+06	3.76828e+06	3.53363e+06	3.35139e+06	2.48285e+06	3.41371e+06	1.37492	0.000103209	0.000127856
DL-Glutamic acid	C5 H9 N O4	8.01538	147.053	0.826	1.00712e+08	8.48907e+07	9.2785e+07	9.13721e+07	8.35811e+07	8.73355e+07	1.01907e+08	1.09636e+08	1.04629e+08	1.2745e+08	1.15987e+08	1.07738e+08	1.16185e+08	9.0312e+07	1.13604e+08	1.25791	0.000305237	0.000367169
Choline		3.12109	103.996	0.608	9.64774e+06	6.65635e+06	9.57219e+06	9.77102e+06	6.72331e+06	6.74456e+06	9.85943e+06	3.18118e+06	3.53569e+06	5.18458e+06	6.09449e+06	5.36086e+06	3.55002e+06	8.22115e+06	4.48447e+06	0.54548	0.00122571	0.00139362
Hexadecanamide	C3 H4 N3 O5 P3	2.2787	254.936	0.633	6.14936e+06	4.7938e+06	3.76729e+06	3.65179e+06	4.94439e+06	5.07644e+06	3.80553e+06	7.17122e+06	7.23158e+06	5.49718e+06	5.22757e+06	5.57632e+06	7.84842e+06	4.33987e+06	6.42538e+06	1.48055	0.00282154	0.0031225
NICTOFLORIN	C27 H30 O15	1.4759	594.158	5.111	3.4886e+06	5.08526e+06	5.42933e+06	4.0497e+06	5.32687e+06	5.26555e+06	5.31325e+06	3.66944e+06	4.11276e+06	4.65607e+06	4.32728e+06	4.20648e+06	4.06605e+06	5.07833e+06	4.17301e+06	0.82173	0.00457015	0.00486311
2-methylcitric acid	C7 H10 O7	1.06013	206.042	0.953	2.02232e+06	2.25644e+06	2.47477e+06	2.61057e+06	2.00693e+06	2.08808e+06	2.98916e+06	1.85208e+06	1.64704e+06	2.18493e+06	2.18147e+06	1.71754e+06	1.71041e+06	2.40433e+06	1.88224e+06	0.782857	0.0154741	0.0160544
2-Methyl-4-ethyl-5-propylthiazole	C9 H15 N S	1.28901	169.092	5.322	2.55457e+06	1.39547e+06	1.71893e+06	1.49325e+06	1.2493e+06	1.95593e+06	1.9435e+06	1.78997e+06	3.07028e+06	3.0464e+06	1.76388e+06	3.1364e+06	1.83364e+06	1.62606e+06	2.44009e+06	1.50061	0.0262412	0.0265613

## Sheet: DL-Vir vs SL-CK
Name	Formula	VIP	Molecular Weight	RT [min]	Area (Max.)	DL-CK-1	DL-CK-2	DL-CK-3	DL-CK-4	DL-CK-5	DL-CK-6	DL-Vir-1	DL-Vir-2	DL-Vir-3	DL-Vir-4	DL-Vir-5	DL-Vir-6	Average DL-CK	Average DL-Vir	FC DL-Vir/DL-CK	P value	P.adjust by FDR
Tyr-Phe	C18 H20 N2 O4	1.17079	328.142	7.134	1.33782e+06	71872.6	74260.7	64942.2	68106.1	75398.9	63220.2	693496	660035	716429	700743	677682	719623	69633.4	694668	9.97607	1.72448e-14	7.50147e-13
2′-Hydroxy-4,4′,6′-trimethoxychalcone	C18 H18 O5	1.89552	314.115	6.843	3.31748e+06	440939	406576	419882	425700	463392	486644	2.07292e+06	2.05046e+06	2.03295e+06	2.02586e+06	2.06736e+06	2.23297e+06	440522	2.08042e+06	4.72262	3.24425e-13	5.86048e-12
(9S,13S)-12-Oxophytodienoic acid	C18 H28 O3	3.15417	292.203	9.506	2.08706e+07	7.86529e+06	8.02475e+06	8.09106e+06	7.66286e+06	8.34197e+06	8.16979e+06	3.6068e+06	3.31465e+06	3.43668e+06	3.49998e+06	3.59099e+06	3.4869e+06	8.02595e+06	3.48933e+06	0.434756	1.21498e-12	1.17448e-11
3-Sulfamoylalanine	C3 H8 N2 O4 S	3.27815	168.021	1.134	7.37315e+06	769423	673208	703008	981652	595311	625473	5.9475e+06	6.18264e+06	5.47803e+06	5.31556e+06	5.24312e+06	5.70997e+06	724679	5.64614e+06	7.79122	3.34923e-11	2.08131e-10
9-Oxo-10(E),12(E)-octadecadienoic acid	C18 H30 O3	1.02285	294.219	10.833	1.43073e+06	683256	761640	682317	715216	691313	736926	252650	208118	241648	267538	199573	219593	711778	231520	0.32527	7.67365e-11	4.17255e-10
camalexin	C11 H8 N2 S	1.95355	200.041	6.858	1.19893e+08	5.95979e+06	6.07225e+06	6.12453e+06	6.17524e+06	6.19278e+06	6.39392e+06	4.43903e+06	4.29247e+06	4.40728e+06	4.50977e+06	4.50328e+06	4.2493e+06	6.15308e+06	4.40019e+06	0.715119	3.9672e-10	2.03027e-09
6-Decylubiquinol	C19 H32 O4	4.37914	324.229	8.774	1.73383e+07	1.15642e+07	1.20349e+07	1.19077e+07	1.17986e+07	1.23856e+07	1.30161e+07	2.04338e+07	2.04006e+07	2.13536e+07	2.22294e+07	1.95405e+07	2.1765e+07	1.21178e+07	2.09538e+07	1.72917	3.20557e-09	1.16202e-08
(+)-α -tocopherol acetate	C16 H24 O	2.18844	232.182	8.774	4.17344e+06	2.72588e+06	2.95991e+06	2.79571e+06	2.51826e+06	2.9117e+06	2.92896e+06	4.773e+06	4.8726e+06	5.21581e+06	5.34062e+06	4.82468e+06	5.08275e+06	2.80674e+06	5.01824e+06	1.78793	3.49101e-09	1.21487e-08
O1-Cinnamoyl-3-[3,5-bis(trifluoromethyl)phenyl]prop-2-enehydroximamide	C34 H34 N2 O12 P2	2.04132	724.159	5.317	4.6109e+06	5.45698e+06	5.46667e+06	6.22232e+06	5.67929e+06	5.93163e+06	5.84798e+06	3.86654e+06	3.95122e+06	3.72229e+06	3.79778e+06	3.82351e+06	3.82805e+06	5.76748e+06	3.83156e+06	0.664339	2.43924e-08	7.85979e-08
1-{[5-Methyl-2-(trifluoromethyl)-3-furyl]carbonyl}-4-piperidinecarboxylic acid	C6 H11 O6 P	1.49392	210.03	1.247	1.84427e+06	2.41685e+06	2.3192e+06	2.05063e+06	2.2891e+06	2.38119e+06	2.35935e+06	1.35547e+06	1.37513e+06	1.34445e+06	1.10955e+06	1.20163e+06	1.2442e+06	2.30272e+06	1.27174e+06	0.552276	3.45349e-08	1.07305e-07
(2S)-2-Hydroxy-N-{(4S,4aS,8S,8aR)-6-[(2S)-3-hydroxy-2-methoxypropyl]-8-methoxy-7,7-dimethylhexahydropyrano[3,2-d][1,3]dioxin-4-yl}-2-[(2R,5R,6R)-2-methoxy-5,6-dimethyl-4-methylenetetrahydro-2H-pyran-2 -yl]acetamide	C25 H43 N O10	1.49862	517.288	6.677	3.49474e+06	3.54375e+06	3.29609e+06	3.55977e+06	3.45596e+06	3.25686e+06	3.63869e+06	2.42522e+06	2.22814e+06	2.52248e+06	2.36748e+06	2.4169e+06	2.49486e+06	3.45852e+06	2.40918e+06	0.696593	7.47079e-08	2.24124e-07
Glycerophosphoglycerol	C6 H15 O8 P	1.31541	246.05	1.359	1.51489e+06	1.82312e+06	1.71247e+06	1.83123e+06	1.59253e+06	1.87326e+06	1.79699e+06	942741	990420	1.13165e+06	843905	889774	1.02214e+06	1.7716e+06	970105	0.547587	9.30517e-08	2.6985e-07
2,4-dihydroxyheptadec-16-enyl acetate	C19 H36 O4	1.07618	328.261	10.206	1.61516e+06	2.06727e+06	2.0167e+06	1.9337e+06	1.83818e+06	2.00192e+06	1.84607e+06	1.40169e+06	1.40579e+06	1.3543e+06	1.47307e+06	1.37617e+06	1.43027e+06	1.95064e+06	1.40688e+06	0.721242	1.45325e-07	3.51202e-07
DL-Phenylalanine	C9 H11 N O2	2.11858	165.079	1.951	1.52857e+07	2.36883e+06	2.53767e+06	2.56845e+06	1.99689e+06	2.75692e+06	2.66834e+06	4.36289e+06	4.83217e+06	4.2746e+06	4.95617e+06	4.30476e+06	4.79148e+06	2.48285e+06	4.58701e+06	1.84748	1.8238e-07	4.17553e-07
L-(+)-Leucine	C6 H13 N O2	2.47824	131.095	1.26	1.3073e+07	5.55979e+06	5.60122e+06	5.9973e+06	6.02417e+06	6.60137e+06	6.38636e+06	8.42013e+06	8.64485e+06	9.42878e+06	9.01068e+06	8.74322e+06	9.29947e+06	6.02837e+06	8.92452e+06	1.48042	2.0884e-07	4.65873e-07
Cumene	C9 H12	1.18888	120.094	5.921	1.3682e+06	1.97271e+06	1.83507e+06	1.92709e+06	1.80252e+06	1.84169e+06	2.12599e+06	1.17667e+06	1.2039e+06	1.22347e+06	1.26786e+06	1.34708e+06	1.29554e+06	1.91751e+06	1.25242e+06	0.653148	2.95182e-07	6.26361e-07
3-O-beta-D-galactosyl-sn-glycerol	C9 H18 O8	1.00403	254.1	0.896	905599	987425	951671	933657	920728	1.18552e+06	1.00245e+06	539911	518303	522267	488493	545694	537089	996909	525293	0.526922	4.06809e-07	8.04372e-07
cyclo-Dopa 5-O-glucoside	C15 H19 N O9	1.35381	357.105	5.684	2.29612e+06	1.63047e+06	2.09282e+06	1.961e+06	1.97111e+06	2.0139e+06	2.15842e+06	1.11255e+06	1.05295e+06	1.13012e+06	1.12017e+06	1.15634e+06	1.05906e+06	1.97129e+06	1.1052e+06	0.560649	5.13198e-07	9.49963e-07
Cinnamic acid	C9 H8 O2	2.16816	148.052	1.952	1.55671e+07	2.95434e+06	3.18461e+06	3.21178e+06	2.49899e+06	3.44025e+06	3.32902e+06	4.99461e+06	5.55909e+06	4.96304e+06	5.76496e+06	5.0366e+06	5.64838e+06	3.10317e+06	5.32778e+06	1.71689	7.09312e-07	1.28563e-06
uridine 5′-diphosphate	C9 H14 N2 O12 P2	1.21243	404.001	4.493	2.32888e+06	3.09623e+06	3.30285e+06	3.07817e+06	2.9659e+06	3.12769e+06	3.3804e+06	2.42688e+06	2.39543e+06	2.40251e+06	2.48862e+06	2.48483e+06	2.55571e+06	3.15854e+06	2.459e+06	0.778524	1.18097e-06	2.0146e-06
(E)-p-coumaric acid	C9 H8 O3	1.25491	164.047	1.209	2.15675e+07	2.88938e+06	2.42058e+06	2.6478e+06	2.58581e+06	2.51353e+06	2.60684e+06	3.53188e+06	3.13355e+06	3.36961e+06	3.3643e+06	3.39327e+06	3.4277e+06	2.61066e+06	3.37005e+06	1.29088	3.94118e-06	6.40868e-06
2-Isopropyl-4,5-dimethyl-1,3-thiazole	C8 H13 N S	1.22297	155.077	6.999	2.54977e+06	2.77979e+06	2.94735e+06	2.96326e+06	2.6675e+06	2.86223e+06	3.16596e+06	2.21253e+06	2.02111e+06	2.11563e+06	2.2942e+06	2.20195e+06	2.20749e+06	2.89768e+06	2.17549e+06	0.750768	3.9778e-06	6.40868e-06
L-(+)-Valine	C5 H11 N O2	1.83619	117.079	0.939	1.13722e+07	3.88427e+06	4.00843e+06	3.58903e+06	4.40303e+06	4.1523e+06	4.06536e+06	5.21344e+06	5.22491e+06	5.80965e+06	5.68897e+06	5.77256e+06	6.15255e+06	4.01707e+06	5.64368e+06	1.40492	5.31312e-06	8.25431e-06
L-(-)-Serine	C3 H7 N O3	6.25741	105.042	0.801	8.0668e+07	5.30627e+07	5.48446e+07	5.98433e+07	5.54043e+07	5.44677e+07	6.37818e+07	7.46816e+07	7.34307e+07	7.15957e+07	7.90292e+07	7.4756e+07	8.1027e+07	5.69007e+07	7.57534e+07	1.33132	6.6741e-06	1.00111e-05
Adenine	C5 H5 N5	1.86061	135.054	1.292	2.48394e+06	2.5902e+06	3.10217e+06	3.11731e+06	2.38587e+06	2.37316e+06	3.67943e+06	1.12804e+06	1.09837e+06	933659	1.27476e+06	1.28789e+06	1.29022e+06	2.87469e+06	1.16882e+06	0.406591	1.45461e-05	2.00875e-05
L-Proline	C5 H9 N O2	1.7948	115.063	0.861	2.46746e+07	9.17953e+06	8.62234e+06	8.90912e+06	9.25789e+06	9.40736e+06	1.00329e+07	7.44973e+06	7.60361e+06	7.64341e+06	7.76542e+06	7.90567e+06	7.56359e+06	9.23485e+06	7.65524e+06	0.828951	1.74251e-05	2.36873e-05
8-(Methylsulfinyl)octyl isothiocyanate	C10 H19 N O S2	9.42542	233.09	7.577	1.67768e+08	1.90591e+08	1.95532e+08	1.99566e+08	1.87426e+08	1.98532e+08	2.06389e+08	1.63816e+08	1.39363e+08	1.71663e+08	1.43431e+08	1.56343e+08	1.42495e+08	1.96339e+08	152851843	0.778508	2.91669e-05	3.84473e-05
2-({2-[4-(4-Fluorophenyl)piperazino]-2-oxoethyl}sulfanyl)acetic acid	C5 H9 N O S	1.44576	131.04	1.527	4.11968e+06	5.08913e+06	5.12596e+06	4.71447e+06	4.44322e+06	4.81806e+06	5.05248e+06	3.80399e+06	3.80619e+06	3.63992e+06	3.98414e+06	3.51239e+06	4.21453e+06	4.87389e+06	3.82686e+06	0.785176	3.58647e-05	4.65706e-05
L-Pyroglutamic acid	C5 H7 N O3	6.81891	129.042	0.801	1.14406e+08	7.14942e+07	7.73336e+07	7.94632e+07	7.4593e+07	7.46295e+07	8.88675e+07	1.0147e+08	9.87913e+07	9.19447e+07	1.05849e+08	9.88259e+07	1.08423e+08	7.77302e+07	1.00884e+08	1.29787	5.21818e-05	6.6762e-05
DL-Glutamine	C5 H10 N2 O3	6.80505	146.069	0.801	1.14506e+08	7.16414e+07	7.7387e+07	7.95169e+07	7.4733e+07	7.47019e+07	8.90513e+07	1.01479e+08	9.88066e+07	9.1986e+07	1.05921e+08	9.88298e+07	1.08518e+08	7.78386e+07	1.00923e+08	1.29657	5.50351e-05	6.93921e-05
4-Oxo-4-(1H-purin-6-ylamino)butanoic acid	C9 H9 N5 O3	4.78286	235.07	1.296	1.52305e+07	1.70362e+07	2.13798e+07	2.10694e+07	1.51317e+07	1.5987e+07	2.5646e+07	7.84775e+06	7.34652e+06	5.17897e+06	8.63227e+06	8.8229e+06	8.95246e+06	1.9375e+07	7.79681e+06	0.402416	5.80748e-05	7.11621e-05
Adenosine	C10 H13 N5 O4	4.78286	267.096	1.291	1.52305e+07	1.70362e+07	2.13798e+07	2.10694e+07	1.51317e+07	1.5987e+07	2.5646e+07	7.84775e+06	7.34652e+06	5.17897e+06	8.63227e+06	8.8229e+06	8.95246e+06	1.9375e+07	7.79681e+06	0.402416	5.80748e-05	7.11621e-05
L-(-)-Asparagine	C4 H8 N2 O3	3.22518	132.053	0.794	2.27947e+07	2.35081e+07	2.37552e+07	2.81318e+07	2.29383e+07	2.31694e+07	2.54008e+07	2.97706e+07	3.02856e+07	2.79571e+07	3.26571e+07	2.76395e+07	3.20208e+07	2.44839e+07	3.00551e+07	1.22755	0.000745675	0.000842516
2-methylcitric acid	C7 H10 O7	1.17743	206.042	0.953	2.02232e+06	2.25644e+06	2.47477e+06	2.61057e+06	2.00693e+06	2.08808e+06	2.98916e+06	1.74295e+06	1.53744e+06	1.25179e+06	1.62558e+06	1.85411e+06	1.75676e+06	2.40433e+06	1.62811e+06	0.677158	0.0011763	0.00131202
monomethyl phosphate	C H5 O4 P	2.1114	111.993	1.374	4.36911e+06	6.23475e+06	6.91092e+06	6.5173e+06	6.31469e+06	6.17043e+06	6.87576e+06	4.32103e+06	5.13148e+06	2.03672e+06	5.48921e+06	2.11152e+06	4.31709e+06	6.50397e+06	3.90118e+06	0.599814	0.00186381	0.00205255
Homocysteine thiolactone	C4 H7 N O S	1.54655	117.025	1.95	6.27079e+06	4.67788e+06	5.41183e+06	5.37758e+06	4.44839e+06	5.7073e+06	6.26034e+06	3.97573e+06	4.14202e+06	2.97864e+06	4.37566e+06	3.99016e+06	4.13688e+06	5.31389e+06	3.93318e+06	0.74017	0.00217103	0.002361
α-Lactose	C12 H22 O11	1.11253	342.115	0.917	3.98056e+06	3.69249e+06	4.01213e+06	3.3138e+06	3.26731e+06	3.5149e+06	4.16702e+06	2.67673e+06	2.79433e+06	3.18677e+06	3.08414e+06	2.80959e+06	3.15925e+06	3.66127e+06	2.9518e+06	0.806222	0.00226687	0.00243478
Adenosine 5'-monophosphate	C10 H14 N5 O7 P	1.55728	142.027	0.992	2.6308e+06	2.93448e+06	2.82156e+06	2.18414e+06	3.34497e+06	3.60131e+06	906488	1.44187e+06	1.13324e+06	1.27469e+06	1.35183e+06	826636	911152	2.63216e+06	1.15657e+06	0.4394	0.00489462	0.00506943
Choline		1.81618	103.996	0.608	9.64774e+06	6.65635e+06	9.57219e+06	9.77102e+06	6.72331e+06	6.74456e+06	9.85943e+06	5.90322e+06	7.02953e+06	3.87167e+06	7.07141e+06	6.06589e+06	5.46102e+06	8.22115e+06	5.90046e+06	0.717717	0.0191419	0.0193645

## Sheet: LL-Vir vs LL-CK
Name	Formula	VIP	Molecular Weight	RT [min]	Area (Max.)	LL-CK-1	LL-CK-2	LL-CK-3	LL-CK-4	LL-CK-5	LL-CK-6	LL-Vir-1	LL-Vir-2	LL-Vir-3	LL-Vir-4	LL-Vir-5	LL-Vir-6	Average LL-CK	Average LL-Vir	FC LL-Vir/LL-CK	P value	P.adjust by FDR
Hexadecasphinganine	C16 H35 N O2	12.4288	273.266	6.936	1.83799e+08	2.85186e+06	3.4272e+06	2.85544e+06	3.19146e+06	3.12798e+06	2.90366e+06	1.75856e+08	1.78718e+08	1.72936e+08	1.77958e+08	1.71649e+08	1.76389e+08	3.0596e+06	1.75584e+08	57.388	3.87603e-18	2.61632e-16
trans-3-Indoleacrylic acid	C11 H9 N O2	7.75715	187.063	4.226	7.10187e+07	3.71148e+06	3.81206e+06	3.82673e+06	3.98815e+06	3.82544e+06	3.85569e+06	6.93632e+07	7.13566e+07	6.9413e+07	7.34085e+07	7.06084e+07	7.21425e+07	3.83659e+06	7.10487e+07	18.5187	1.70897e-16	5.76777e-15
Indole	C8 H7 N	1.80871	117.058	4.227	3.76599e+06	200679	203751	201670	195493	179815	207884	3.66223e+06	3.86907e+06	3.86469e+06	3.88305e+06	3.87557e+06	3.95264e+06	198215	3.85121e+06	19.4294	6.45171e-16	1.45163e-14
2,4-dihydroxyheptadec-16-enyl acetate	C19 H36 O4	1.21299	328.261	10.206	1.61516e+06	1.74865e+06	1.88746e+06	1.90305e+06	1.92602e+06	1.88697e+06	1.83104e+06	210961	211397	229899	236513	213514	211124	1.86387e+06	218901	0.117445	3.15447e-14	2.36586e-13
2′-Hydroxy-4,4′,6′-trimethoxychalcone	C18 H18 O5	1.52207	314.115	6.843	3.31748e+06	622603	596203	631842	585201	638225	625068	3.34854e+06	3.25444e+06	3.0393e+06	3.19319e+06	3.29403e+06	3.12048e+06	616524	3.20833e+06	5.20391	1.04874e-13	6.15564e-13
(9S,13S)-12-Oxophytodienoic acid	C18 H28 O3	3.61811	292.203	9.506	2.08706e+07	6.12037e+06	6.43973e+06	6.67448e+06	6.82208e+06	6.58382e+06	6.34231e+06	2.09488e+07	2.03805e+07	2.06065e+07	2.14691e+07	2.2078e+07	2.13268e+07	6.49713e+06	2.11349e+07	3.25296	1.22967e-13	6.9169e-13
(+)-α -tocopherol acetate	C16 H24 O	2.22697	232.182	8.774	4.17344e+06	5.72521e+06	5.9747e+06	5.57776e+06	6.03878e+06	5.56425e+06	6.21234e+06	284505	294444	295166	326071	322697	297174	5.84884e+06	303343	0.0518637	2.04646e-13	9.86686e-13
6-Decylubiquinol	C19 H32 O4	4.52708	324.229	8.774	1.73383e+07	2.39091e+07	2.61996e+07	2.32398e+07	2.46153e+07	2.30509e+07	2.45932e+07	1.37704e+06	1.27656e+06	1.37271e+06	1.37156e+06	1.31935e+06	1.35535e+06	2.4268e+07	1.34543e+06	0.0554404	3.18341e-13	1.38645e-12
(E)-p-coumaric acid	C9 H8 O3	4.04933	164.047	1.209	2.15675e+07	2.45254e+06	2.4999e+06	2.47912e+06	2.32807e+06	2.61837e+06	2.54603e+06	1.93006e+07	2.11701e+07	2.11624e+07	2.22615e+07	2.02984e+07	2.08216e+07	2.48734e+06	2.08358e+07	8.37674	6.76549e-13	2.63656e-12
Coumarone	C8 H6 O	2.08851	118.042	1.206	5.60468e+06	590224	585829	609624	620745	625679	621978	4.99526e+06	5.40357e+06	5.7726e+06	5.68674e+06	5.56261e+06	5.51069e+06	609013	5.48858e+06	9.01225	9.96546e-13	3.73705e-12
L-alpha-Glycerylphosphorylcholine	C8 H20 N O6 P	4.99289	257.102	0.844	2.44397e+07	3.31629e+07	3.30463e+07	3.06457e+07	3.17918e+07	3.07333e+07	3.4748e+07	4.44581e+06	4.31476e+06	4.30559e+06	4.43301e+06	4.54431e+06	4.68481e+06	3.23547e+07	4.45471e+06	0.137684	1.20114e-12	4.26721e-12
(9Z,11E,13S,15Z)-13-Hydroperoxy-9,11,15-octadecatrienoic acid	C18 H30 O4	1.10694	310.214	8.7	1.8018e+06	497487	379621	422634	534580	438487	563065	1.87699e+06	1.84217e+06	1.83354e+06	1.77165e+06	1.85915e+06	1.88575e+06	472646	1.84488e+06	3.90329	1.71877e-12	5.65936e-12
Glycylprolylhydroxyproline	C12 H19 N3 O5	1.67939	285.132	2.083	3.84603e+06	505561	475703	455518	529195	487336	489156	3.76772e+06	3.70615e+06	3.51229e+06	3.40334e+06	3.92436e+06	3.57542e+06	490412	3.64821e+06	7.43908	1.93083e-12	6.20623e-12
Benzoic acid	C7 H6 O2	1.01279	122.037	1.207	1.40111e+06	234620	226132	223283	244509	257872	197272	1.28093e+06	1.42515e+06	1.43507e+06	1.4192e+06	1.29406e+06	1.42183e+06	230615	1.37937e+06	5.98128	3.99256e-12	1.19777e-11
Homocysteine thiolactone	C4 H7 N O S	1.68989	117.025	1.95	6.27079e+06	3.69473e+06	3.54765e+06	3.20294e+06	3.72917e+06	3.37406e+06	3.24862e+06	271536	272227	250135	221967	308259	278799	3.46619e+06	267154	0.0770741	9.80184e-12	2.81542e-11
camalexin	C11 H8 N2 S	10.1428	200.041	6.858	1.19893e+08	671713	673672	624729	572328	659016	700088	1.07003e+08	1.08407e+08	1.23165e+08	1.09389e+08	1.25048e+08	1.22119e+08	650258	1.15855e+08	178.168	1.29152e-11	3.63241e-11
DL-Phenylalanine	C9 H11 N O2	3.1499	165.079	1.951	1.52857e+07	4.69527e+06	3.81454e+06	3.49516e+06	4.15474e+06	4.1044e+06	4.22037e+06	1.46496e+07	1.52259e+07	1.58537e+07	1.58017e+07	1.56971e+07	1.40586e+07	4.08075e+06	1.52144e+07	3.72835	1.64127e-11	4.43143e-11
Salicylic acid	C7 H6 O3	1.07544	138.032	4.726	1.76909e+06	385816	417469	382477	406985	378353	417425	1.67422e+06	1.68143e+06	1.66171e+06	1.54574e+06	1.79159e+06	1.80902e+06	398088	1.69395e+06	4.25523	1.83902e-11	4.86801e-11
Cinnamic acid	C9 H8 O2	3.1158	148.052	1.952	1.55671e+07	4.71006e+06	3.82712e+06	3.52105e+06	4.22332e+06	4.17995e+06	4.29429e+06	1.42921e+07	1.49086e+07	1.56243e+07	1.57031e+07	1.55871e+07	1.40177e+07	4.12596e+06	1.50221e+07	3.64088	2.27222e-11	5.79574e-11
uridine 5′-diphosphate	C9 H14 N2 O12 P2	1.23612	404.001	4.493	2.32888e+06	3.09004e+06	3.08911e+06	3.11829e+06	3.29171e+06	3.31772e+06	3.32894e+06	1.50769e+06	1.38799e+06	1.46158e+06	1.4874e+06	1.53715e+06	1.56605e+06	3.20597e+06	1.49131e+06	0.465167	2.49622e-11	6.24054e-11
L-(+)-Arginine	C6 H14 N4 O2	6.61319	174.111	0.759	7.69253e+07	8.00844e+07	8.21788e+07	8.2157e+07	8.37594e+07	7.77696e+07	8.64824e+07	3.42761e+07	3.36607e+07	2.90938e+07	3.02509e+07	3.47036e+07	3.58451e+07	8.20719e+07	3.29717e+07	0.401742	4.03306e-11	9.72255e-11
alpha.-Aminoadipic acid	C6 H11 N O4	1.93125	161.069	0.901	6.03886e+06	1.83091e+06	1.65243e+06	1.52264e+06	1.91657e+06	1.88078e+06	1.558e+06	6.36612e+06	6.11345e+06	5.62433e+06	5.79761e+06	6.03767e+06	5.58186e+06	1.72689e+06	5.92017e+06	3.42823	4.95807e-11	1.14471e-10
DL-2,6-Diaminopimelic acid	C7 H14 N2 O4	3.26649	190.095	0.847	1.42449e+07	945172	1.23613e+06	1.12882e+06	904306	946972	1.2393e+06	1.33244e+07	1.31833e+07	1.16106e+07	1.22941e+07	1.33475e+07	1.4488e+07	1.06678e+06	1.30413e+07	12.2249	5.00282e-11	1.14471e-10
2-O-(beta-D-glucosyl)-sn-glycerol 3-phosphate	C9 H19 O11 P	1.576	334.066	1.338	2.97458e+06	4.01117e+06	3.53877e+06	3.58592e+06	3.43982e+06	3.90852e+06	3.72417e+06	1.01235e+06	950492	781649	849659	939730	937878	3.7014e+06	911960	0.246383	5.93592e-11	1.33558e-10
D-PANTOTHENIC ACID	C9 H17 N O5	1.4974	219.11	4.237	3.00759e+06	273448	366633	568618	355948	330809	381770	2.84652e+06	2.94138e+06	2.79714e+06	2.61677e+06	3.2122e+06	2.95843e+06	379538	2.8954e+06	7.62877	8.50639e-11	1.84001e-10
Cytidine	C9 H13 N3 O5	1.84277	243.085	1.11	4.46858e+06	5.88006e+06	6.80937e+06	6.69426e+06	6.28754e+06	6.68026e+06	6.51694e+06	2.69457e+06	2.52651e+06	2.64149e+06	2.69455e+06	2.61329e+06	2.76698e+06	6.47807e+06	2.65623e+06	0.410034	1.38191e-10	2.70374e-10
L-(+)-Leucine	C6 H13 N O2	2.14767	131.095	1.26	1.3073e+07	7.76706e+06	7.41677e+06	7.6397e+06	7.4898e+06	8.60913e+06	7.87633e+06	1.26699e+07	1.29023e+07	1.29228e+07	1.31865e+07	1.33456e+07	1.28784e+07	7.7998e+06	1.29842e+07	1.66469	1.83903e-10	3.54671e-10
S-methyl D-thioglycerate	C4 H8 O3 S	1.70192	136.019	1.184	3.7674e+06	161736	147569	158905	179947	172514	171447	3.06108e+06	3.33967e+06	3.58182e+06	3.85544e+06	3.64495e+06	3.07273e+06	165353	3.42595e+06	20.719	2.70106e-10	4.92761e-10
Gly-Leu	C8 H16 N2 O3	1.70995	188.116	0.947	3.61597e+06	152644	116031	114567	165106	149142	125529	3.44763e+06	2.88515e+06	3.80554e+06	3.77174e+06	3.43414e+06	3.25209e+06	137170	3.43271e+06	25.0253	4.37192e-10	7.7659e-10
L-Theanine	C7 H14 N2 O3	2.60358	174.1	0.883	1.25494e+07	4.83494e+06	4.60176e+06	4.42073e+06	5.13683e+06	5.08571e+06	4.56888e+06	1.27371e+07	1.16802e+07	1.21675e+07	1.14886e+07	1.35925e+07	1.28158e+07	4.77481e+06	1.24136e+07	2.59982	7.587e-10	1.29651e-09
8-(Methylsulfinyl)octyl isothiocyanate	C10 H19 N O S2	8.00605	233.09	7.577	1.67768e+08	1.53103e+08	1.5676e+08	1.55921e+08	1.65797e+08	1.40298e+08	1.52804e+08	8.31842e+07	7.99864e+07	8.10657e+07	8.20878e+07	8.3683e+07	8.10339e+07	1.54114e+08	8.18402e+07	0.531037	1.24187e-09	2.06979e-09
cyclo-Dopa 5-O-glucoside	C15 H19 N O9	1.26536	357.105	5.684	2.29612e+06	2.31134e+06	2.30199e+06	2.53951e+06	2.27976e+06	2.29026e+06	1.89572e+06	445972	402802	451933	465974	470646	527813	2.26976e+06	460857	0.203042	1.38009e-09	2.24472e-09
D-Glucose 6-phosphate	C6 H13 O9 P	1.15561	260.029	1.339	2.46905e+06	3.19237e+06	3.32011e+06	3.19433e+06	3.42123e+06	3.25152e+06	3.31156e+06	1.83745e+06	1.73418e+06	1.55553e+06	1.6543e+06	1.96437e+06	1.89668e+06	3.28185e+06	1.77375e+06	0.540473	1.44441e-09	2.32138e-09
4-(Dimethylsulfonio)-2-hydroxybutanoate	C6 H12 O3 S	2.12257	164.051	2.017	5.86646e+06	251651	346411	377385	301888	272673	350088	5.70543e+06	5.83372e+06	4.66495e+06	4.55842e+06	5.81998e+06	5.84108e+06	316683	5.40393e+06	17.0642	1.99815e-09	3.10059e-09
α-Lactose	C12 H22 O11	1.87158	342.115	0.917	3.98056e+06	5.30191e+06	5.64749e+06	5.00959e+06	5.77124e+06	5.67928e+06	6.45745e+06	1.66978e+06	1.61598e+06	1.80566e+06	1.71761e+06	1.72128e+06	1.57723e+06	5.64449e+06	1.68459e+06	0.298449	2.69508e-09	4.08805e-09
2-Indolylformic acid	C9 H7 N O2	1.57718	161.048	5.117	4.15426e+06	604061	764944	665047	716447	675806	675113	3.42413e+06	3.1333e+06	3.37019e+06	3.53809e+06	4.15596e+06	3.35222e+06	683569	3.49565e+06	5.11381	2.77331e-09	4.15997e-09
2-Amino-1,3,4-octadecanetriol	C18 H39 N O3	1.28902	317.292	6.995	2.94347e+06	4.70997e+06	4.74111e+06	4.70753e+06	4.13231e+06	4.55581e+06	4.54466e+06	2.51225e+06	2.70504e+06	2.7005e+06	2.66998e+06	2.75987e+06	2.73746e+06	4.56523e+06	2.68085e+06	0.587232	3.77805e-09	5.6048e-09
L-(-)-Serine	C3 H7 N O3	5.76798	105.042	0.801	8.0668e+07	8.48343e+07	8.39669e+07	8.02003e+07	7.45944e+07	8.47761e+07	8.3101e+07	4.79037e+07	4.38129e+07	4.00725e+07	4.13289e+07	4.62989e+07	4.58313e+07	8.19122e+07	4.4208e+07	0.539701	4.67526e-09	6.78667e-09
1,2-di-O-sinapoyl-beta-D-glucose	C28 H32 O14	1.10066	592.178	5.75	2.48687e+06	1.72303e+06	2.05428e+06	1.81406e+06	1.51274e+06	1.81438e+06	1.9071e+06	484587	422702	394061	431575	394999	453752	1.80426e+06	430279	0.238479	5.38545e-09	7.73442e-09
L-(+)-Aspartic acid	C4 H7 N O4	2.12062	133.037	0.848	7.82809e+06	1.11545e+07	1.21463e+07	1.17573e+07	1.15206e+07	1.11062e+07	1.28896e+07	6.65346e+06	6.54109e+06	6.55254e+06	6.45093e+06	6.91807e+06	6.84333e+06	1.17624e+07	6.6599e+06	0.566202	6.43767e-09	9.05298e-09
Sinapinic acid	C34 H27 N2 O5 P	1.07706	574.167	5.749	2.35263e+06	1.60686e+06	1.95959e+06	1.72224e+06	1.45222e+06	1.74816e+06	1.85236e+06	456951	398069	373828	407756	371241	432416	1.72357e+06	406710	0.235969	6.99687e-09	9.73791e-09
L-(-)-Asparagine	C4 H8 N2 O3	2.81404	132.053	0.794	2.27947e+07	2.25173e+07	2.32627e+07	2.24845e+07	2.15249e+07	2.33132e+07	2.41132e+07	1.51639e+07	1.34383e+07	1.28479e+07	1.32417e+07	1.46152e+07	1.39965e+07	2.28693e+07	1.38839e+07	0.607098	7.5966e-09	1.04647e-08
L-Pyroglutamic acid	C5 H7 N O3	6.94509	129.042	0.801	1.14406e+08	1.22874e+08	1.16643e+08	1.13824e+08	1.05554e+08	1.18241e+08	1.2396e+08	6.69491e+07	6.21459e+07	5.73643e+07	5.81227e+07	6.55215e+07	6.24644e+07	1.1685e+08	6.20946e+07	0.531407	8.62711e-09	1.15313e-08
DL-Glutamine	C5 H10 N2 O3	6.93397	146.069	0.801	1.14506e+08	1.22888e+08	1.16597e+08	1.13803e+08	1.05548e+08	1.1825e+08	1.24014e+08	6.70993e+07	6.23306e+07	5.75491e+07	5.8334e+07	6.56533e+07	6.26188e+07	1.1685e+08	6.22642e+07	0.532856	8.93557e-09	1.18265e-08
DL-Glutamic acid	C5 H9 N O4	6.54058	147.053	0.826	1.00712e+08	1.02552e+08	1.00849e+08	9.54174e+07	8.99572e+07	9.45455e+07	1.07796e+08	5.11835e+07	4.93176e+07	4.63505e+07	4.83519e+07	5.43734e+07	5.00144e+07	9.85196e+07	4.99319e+07	0.506822	1.01214e-08	1.31383e-08
DL-Lysine	C6 H14 N2 O2	1.4546	146.105	0.659	3.31892e+06	715293	703689	617219	744354	730904	726135	3.13086e+06	3.26813e+06	3.16567e+06	2.37596e+06	3.30089e+06	3.42727e+06	706266	3.11146e+06	4.40551	2.42584e-08	3.0323e-08
L-(-)-Threonine	C4 H9 N O3	2.0072	119.058	0.811	1.31863e+07	9.41335e+06	8.92756e+06	8.65854e+06	8.54802e+06	9.55967e+06	8.56664e+06	1.35113e+07	1.3508e+07	1.2492e+07	1.40139e+07	1.41212e+07	1.35844e+07	8.94563e+06	1.35385e+07	1.51341	2.60118e-08	3.19236e-08
L-(+)-Valine	C5 H11 N O2	2.03878	117.079	0.939	1.13722e+07	5.26009e+06	5.07148e+06	4.5587e+06	5.12017e+06	5.44987e+06	5.01631e+06	9.28475e+06	9.07107e+06	1.06094e+07	1.10778e+07	9.47424e+06	9.57142e+06	5.07944e+06	9.84812e+06	1.93882	8.78789e-08	1.04067e-07
3-O-feruloyl-D-quinic acid	C17 H20 O9	1.74552	368.11	5.882	8.6185e+06	5.42652e+06	5.45207e+06	4.92191e+06	5.72754e+06	5.28584e+06	6.75216e+06	2.08369e+06	2.02329e+06	2.11947e+06	2.21783e+06	2.11855e+06	2.06975e+06	5.59434e+06	2.10543e+06	0.376349	8.95568e-08	1.04226e-07
2-methylcitric acid	C7 H10 O7	1.12905	206.042	0.953	2.02232e+06	1.62223e+06	1.98248e+06	1.807e+06	1.66362e+06	1.47548e+06	2.19691e+06	325127	316109	292854	285930	389220	361467	1.79129e+06	328451	0.18336	9.80584e-08	1.13144e-07
5'-O-beta-D-Glucosylpyridoxine	C14 H21 N O8	1.1297	331.126	0.916	2.54329e+06	3.21353e+06	2.46254e+06	3.00017e+06	2.96584e+06	2.96443e+06	2.62486e+06	1.47967e+06	1.48817e+06	1.39069e+06	1.41075e+06	1.33175e+06	1.33095e+06	2.87189e+06	1.40533e+06	0.489338	1.76615e-07	2.0206e-07
Kaempferol	C15 H10 O6	1.1141	286.047	5.291	4.48469e+06	4.8418e+06	4.32032e+06	4.78566e+06	4.5826e+06	4.95212e+06	4.82411e+06	3.33033e+06	3.33441e+06	3.21952e+06	3.23858e+06	3.00242e+06	3.57286e+06	4.71777e+06	3.28302e+06	0.695884	3.16041e-07	3.58534e-07
DL-Citrulline	C6 H13 N3 O3	1.45412	175.095	0.81	1.7598e+07	9.50783e+06	9.77094e+06	8.74524e+06	8.60945e+06	9.00585e+06	9.07615e+06	6.317e+06	6.67699e+06	7.00851e+06	6.40078e+06	6.72422e+06	6.87404e+06	9.11924e+06	6.66692e+06	0.731083	4.09545e-07	4.60738e-07
L-Phenylalanine	C9 H11 N O2	1.91972	165.079	2.571	6.82535e+06	1.21062e+06	1.56534e+06	1.11517e+06	1.23236e+06	1.0445e+06	1.56441e+06	5.80754e+06	6.4824e+06	5.13543e+06	4.02123e+06	6.87202e+06	5.25119e+06	1.28873e+06	5.59497e+06	4.34145	1.53534e-06	1.67154e-06
DL-Histidine	C6 H9 N3 O2	1.19772	155.069	0.768	2.99755e+06	457397	437960	469204	454740	526090	399969	2.13164e+06	1.86629e+06	2.00844e+06	3.03974e+06	1.89897e+06	1.98183e+06	457560	2.15449e+06	4.70864	2.98777e-06	3.17598e-06
monomethyl phosphate	C H5 O4 P	1.26498	111.993	1.374	4.36911e+06	5.63059e+06	5.80118e+06	5.71114e+06	5.68916e+06	5.31082e+06	5.97712e+06	4.00161e+06	2.83165e+06	3.94901e+06	3.66196e+06	4.24749e+06	3.98938e+06	5.68667e+06	3.78018e+06	0.664745	6.63006e-06	6.78074e-06
Glycerophosphoglycerol	C6 H15 O8 P	1.0204	246.05	1.359	1.51489e+06	2.4496e+06	1.76956e+06	1.35124e+06	1.49768e+06	1.79582e+06	1.84032e+06	502547	543589	499288	626676	549961	498035	1.78404e+06	536683	0.300825	1.1695e-05	1.18708e-05
Choline		1.5672	103.996	0.608	9.64774e+06	8.31571e+06	1.45272e+07	1.55565e+07	9.23381e+06	9.24084e+06	1.4051e+07	8.84243e+06	8.70806e+06	5.55378e+06	6.40325e+06	8.89109e+06	7.8468e+06	1.18209e+07	7.70757e+06	0.652032	0.0168792	0.0168792

## Sheet: LL-Avr vs LL-CK
Name	Formula	VIP	Molecular Weight	RT [min]	Area (Max.)	LL-CK-1	LL-CK-2	LL-CK-3	LL-CK-4	LL-CK-5	LL-CK-6	LL-Avr-1	LL-Avr-2	LL-Avr-3	LL-Avr-4	LL-Avr-5	LL-Avr-6	Average LL-CK	Average LL-Avr	FC LL-Avr/LL-CK	P value	P.adjust by FDR
Tyr-Phe	C18 H20 N2 O4	1.18223	328.142	7.134	1.33782e+06	92675.6	94159.3	88717.3	89210	88027.2	87289.4	1.30946e+06	1.29065e+06	1.31488e+06	1.25399e+06	1.28894e+06	1.28798e+06	90013.1	1.29098e+06	14.3422	1.11649e-17	1.0495e-15
2,4-dihydroxyheptadec-16-ynyl acetate	C19 H34 O4	1.04719	326.245	9.428	1.23944e+06	1.2036e+06	1.20771e+06	1.23988e+06	1.20762e+06	1.25361e+06	1.23342e+06	286802	293563	291094	274423	263463	282543	1.22431e+06	281981	0.230319	3.18751e-16	7.00723e-15
O1-Cinnamoyl-3-[3,5-bis(trifluoromethyl)phenyl]prop-2-enehydroximamide	C34 H34 N2 O12 P2	1.94538	724.159	5.317	4.6109e+06	3.91518e+06	4.04661e+06	3.90657e+06	3.87517e+06	3.86758e+06	3.97425e+06	742653	640874	731494	637908	684916	643178	3.93089e+06	680171	0.173032	3.72725e-16	7.00723e-15
2′-Hydroxy-4,4′,6′-trimethoxychalcone	C18 H18 O5	1.72521	314.115	6.843	3.31748e+06	622603	596203	631842	585201	638225	625068	3.2581e+06	3.12656e+06	3.10635e+06	3.14817e+06	3.1336e+06	3.26599e+06	616524	3.17313e+06	5.14681	1.18099e-15	1.85022e-14
(2S)-2-Hydroxy-N-{(4S,4aS,8S,8aR)-6-[(2S)-3-hydroxy-2-methoxypropyl]-8-methoxy-7,7-dimethylhexahydropyrano[3,2-d][1,3]dioxin-4-yl}-2-[(2R,5R,6R)-2-methoxy-5,6-dimethyl-4-methylenetetrahydro-2H-pyran-2 -yl]acetamide	C25 H43 N O10	1.53338	517.288	6.677	3.49474e+06	2.68107e+06	2.66953e+06	2.61565e+06	2.53647e+06	2.67188e+06	2.69958e+06	651483	572880	640077	624779	638128	620112	2.6457e+06	624577	0.236073	4.63648e-15	5.44787e-14
(9S,13S)-12-Oxophytodienoic acid	C18 H28 O3	2.45606	292.203	9.506	2.08706e+07	6.12037e+06	6.43973e+06	6.67448e+06	6.82208e+06	6.58382e+06	6.34231e+06	1.29766e+06	1.3712e+06	1.24305e+06	1.3276e+06	1.26905e+06	1.32923e+06	6.49713e+06	1.3063e+06	0.201058	2.51614e-13	1.57678e-12
2,4-dihydroxyheptadec-16-enyl acetate	C19 H36 O4	1.26965	328.261	10.206	1.61516e+06	1.74865e+06	1.88746e+06	1.90305e+06	1.92602e+06	1.88697e+06	1.83104e+06	458646	470455	455304	491234	457285	524724	1.86387e+06	476275	0.255531	3.35208e-13	1.94471e-12
2-Amino-1,3,4-octadecanetriol	C18 H39 N O3	2.17249	317.292	6.995	2.94347e+06	4.70997e+06	4.74111e+06	4.70753e+06	4.13231e+06	4.55581e+06	4.54466e+06	501191	515025	498610	484872	486438	523571	4.56523e+06	501618	0.109878	9.79889e-13	4.75046e-12
Hexadecasphinganine	C16 H35 N O2	2.88773	273.266	6.936	1.83799e+08	2.85186e+06	3.4272e+06	2.85544e+06	3.19146e+06	3.12798e+06	2.90366e+06	1.04217e+07	1.07422e+07	9.88648e+06	1.00404e+07	9.92999e+06	1.04062e+07	3.0596e+06	1.02378e+07	3.34613	1.13834e-12	4.75046e-12
(+)-α -tocopherol acetate	C16 H24 O	2.20927	232.182	8.774	4.17344e+06	5.72521e+06	5.9747e+06	5.57776e+06	6.03878e+06	5.56425e+06	6.21234e+06	1.64044e+06	1.63835e+06	1.59673e+06	1.55189e+06	1.6416e+06	1.78774e+06	5.84884e+06	1.64279e+06	0.280875	4.79637e-12	1.66985e-11
6-Decylubiquinol	C19 H32 O4	4.48725	324.229	8.774	1.73383e+07	2.39091e+07	2.61996e+07	2.32398e+07	2.46153e+07	2.30509e+07	2.45932e+07	6.79966e+06	6.88016e+06	6.87927e+06	6.87097e+06	7.00942e+06	7.07938e+06	2.4268e+07	6.91981e+06	0.285142	5.26681e-12	1.76814e-11
Citric acid	C6 H8 O7	1.78336	192.027	1.553	2.63684e+06	148204	243755	192014	178204	173027	237552	2.83441e+06	2.88384e+06	2.56925e+06	3.07823e+06	3.20047e+06	3.07737e+06	195459	2.94059e+06	15.0445	5.13677e-11	1.34127e-10
16-Heptadecyne-1,2,4-triol	C17 H32 O3	1.15947	306.219	13.915	1.46018e+06	312557	307929	227436	259896	252992	300173	1.47457e+06	1.44364e+06	1.50024e+06	1.27601e+06	1.54537e+06	1.40443e+06	276831	1.44071e+06	5.2043	6.67687e-11	1.69629e-10
indol-3-ylmethyl-ascorbate	C15 H15 N O6	1.04688	305.089	5.396	2.35168e+06	846258	752337	859448	863356	747260	766356	1.71976e+06	1.75377e+06	1.71279e+06	1.84275e+06	1.83935e+06	1.65943e+06	805836	1.75464e+06	2.17742	2.24751e-10	4.91317e-10
Homocysteine thiolactone	C4 H7 N O S	2.00584	117.025	1.95	6.27079e+06	3.69473e+06	3.54765e+06	3.20294e+06	3.72917e+06	3.37406e+06	3.24862e+06	7.00054e+06	6.77822e+06	6.40347e+06	7.28135e+06	7.17115e+06	7.0797e+06	3.46619e+06	6.95241e+06	2.00577	8.77473e-10	1.75495e-09
alpha-Ketoglutaric acid	C5 H6 O5	1.20949	146.021	1.556	1.19951e+06	73141.1	105981	100144	87325.2	87027.5	92779.7	1.516e+06	1.17394e+06	1.22027e+06	1.46892e+06	1.5002e+06	1.28867e+06	91066.4	1.36133e+06	14.9488	1.72543e-09	3.31001e-09
8-(Methylsulfinyl)octyl isothiocyanate	C10 H19 N O S2	8.46248	233.09	7.577	1.67768e+08	1.53103e+08	1.5676e+08	1.55921e+08	1.65797e+08	1.40298e+08	1.52804e+08	9.05577e+07	8.97057e+07	9.04331e+07	9.08886e+07	9.70822e+07	9.17239e+07	1.54114e+08	9.17319e+07	0.595221	7.45972e-09	1.29156e-08
trans-3-Indoleacrylic acid	C11 H9 N O2	1.10561	187.063	4.226	7.10187e+07	3.71148e+06	3.81206e+06	3.82673e+06	3.98815e+06	3.82544e+06	3.85569e+06	4.96042e+06	4.74849e+06	4.7195e+06	4.88794e+06	5.04575e+06	5.09192e+06	3.83659e+06	4.909e+06	1.27952	3.88313e-08	6.11559e-08
1-{[5-Methyl-2-(trifluoromethyl)-3-furyl]carbonyl}-4-piperidinecarboxylic acid	C6 H11 O6 P	1.1257	210.03	1.247	1.84427e+06	2.33898e+06	2.34891e+06	1.94372e+06	2.4034e+06	2.46198e+06	2.31477e+06	1.13014e+06	1.14647e+06	1.32694e+06	1.16451e+06	1.12186e+06	1.21943e+06	2.30196e+06	1.18489e+06	0.514731	8.08264e-08	1.22543e-07
L-(+)-Valine	C5 H11 N O2	1.48452	117.079	0.939	1.13722e+07	5.26009e+06	5.07148e+06	4.5587e+06	5.12017e+06	5.44987e+06	5.01631e+06	3.02219e+06	3.35087e+06	2.90553e+06	3.03219e+06	3.08274e+06	3.39263e+06	5.07944e+06	3.13103e+06	0.616412	1.05975e-07	1.58122e-07
L-(+)-Leucine	C6 H13 N O2	1.68604	131.095	1.26	1.3073e+07	7.76706e+06	7.41677e+06	7.6397e+06	7.4898e+06	8.60913e+06	7.87633e+06	4.94756e+06	5.32181e+06	5.66248e+06	5.2102e+06	5.37954e+06	5.16927e+06	7.7998e+06	5.28181e+06	0.677172	1.97776e-07	2.86014e-07
L-(-)-Threonine	C4 H9 N O3	1.75609	119.058	0.811	1.31863e+07	9.41335e+06	8.92756e+06	8.65854e+06	8.54802e+06	9.55967e+06	8.56664e+06	6.68403e+06	6.32374e+06	6.05329e+06	6.23161e+06	5.72947e+06	6.20655e+06	8.94563e+06	6.20478e+06	0.69361	2.20062e-07	3.13422e-07
(1R,9S,12S,13R,14S,17R,18E,21S,23S,24R,25S,27R)-17-Ethyl-1,14-dihydroxy-12-{(1E)-1-[(1R,3R,4R)-4-hydroxy-3-methoxycyclohexyl]-1-propen-2-yl}-23,25-dimethoxy-13,19,21,27-tetramethyl-11,28-dioxa-4-azatr ;icyclo[22.3.1.04,9]octacos-18-en-2,3,10,16-tetron	C43 H69 N O12	5.63603	791.48	10.682	7.92681e+07	9.90395e+07	9.3901e+07	1.01232e+08	9.8957e+07	9.54206e+07	1.08181e+08	6.62266e+07	7.08231e+07	7.51448e+07	7.17718e+07	7.21444e+07	7.14369e+07	9.94551e+07	7.12579e+07	0.716483	3.16898e-07	4.44604e-07
L-(+)-Aspartic acid	C4 H7 N O4	1.88039	133.037	0.848	7.82809e+06	1.11545e+07	1.21463e+07	1.17573e+07	1.15206e+07	1.11062e+07	1.28896e+07	8.76397e+06	8.79188e+06	8.33718e+06	8.67928e+06	8.33937e+06	8.68995e+06	1.17624e+07	8.60027e+06	0.731166	6.74859e-07	9.19372e-07
2-({2-[4-(4-Fluorophenyl)piperazino]-2-oxoethyl}sulfanyl)acetic acid	C5 H9 N O S	1.36849	131.04	1.527	4.11968e+06	3.59847e+06	4.41287e+06	4.34188e+06	4.01202e+06	3.66808e+06	3.95417e+06	2.45703e+06	2.15286e+06	2.34504e+06	2.18763e+06	2.5855e+06	2.24557e+06	3.99792e+06	2.32894e+06	0.582538	7.08292e-07	9.51135e-07
Cinnamic acid	C9 H8 O2	1.42356	148.052	1.952	1.55671e+07	4.71006e+06	3.82712e+06	3.52105e+06	4.22332e+06	4.17995e+06	4.29429e+06	2.3467e+06	2.20618e+06	2.27097e+06	2.2521e+06	2.3013e+06	2.46837e+06	4.12596e+06	2.3076e+06	0.559288	9.12271e-07	1.2078e-06
DL-Phenylalanine	C9 H11 N O2	1.35783	165.079	1.951	1.52857e+07	4.69527e+06	3.81454e+06	3.49516e+06	4.15474e+06	4.1044e+06	4.22037e+06	2.47006e+06	2.31586e+06	2.38138e+06	2.35504e+06	2.39715e+06	2.57217e+06	4.08075e+06	2.41528e+06	0.591871	1.84377e-06	2.37417e-06
Adenine	C5 H5 N5	1.22472	135.054	1.292	2.48394e+06	1.45885e+06	2.1941e+06	2.13038e+06	1.85095e+06	1.65146e+06	2.2141e+06	696278	412425	525226	651150	660136	443915	1.91664e+06	564855	0.294711	1.87866e-06	2.3864e-06
1,2-di-O-sinapoyl-beta-D-glucose	C28 H32 O14	1.15556	592.178	5.75	2.48687e+06	1.72303e+06	2.05428e+06	1.81406e+06	1.51274e+06	1.81438e+06	1.9071e+06	3.4696e+06	3.23117e+06	2.85395e+06	3.08054e+06	2.6877e+06	2.81141e+06	1.80426e+06	3.0224e+06	1.67514	5.9826e-06	7.2098e-06
Sinapinic acid	C34 H27 N2 O5 P	1.06126	574.167	5.749	2.35263e+06	1.60686e+06	1.95959e+06	1.72224e+06	1.45222e+06	1.74816e+06	1.85236e+06	3.11727e+06	2.9057e+06	2.56612e+06	2.80689e+06	2.61922e+06	2.50263e+06	1.72357e+06	2.75297e+06	1.59725	6.52711e-06	7.76644e-06
4-Oxo-4-(1H-purin-6-ylamino)butanoic acid	C9 H9 N5 O3	3.0687	235.07	1.296	1.52305e+07	9.12411e+06	1.45192e+07	1.38638e+07	1.04893e+07	9.94656e+06	1.4936e+07	3.90758e+06	2.44324e+06	3.22514e+06	4.2992e+06	4.02506e+06	2.81781e+06	1.21465e+07	3.453e+06	0.28428	1.23371e-05	1.43171e-05
Adenosine	C10 H13 N5 O4	3.0687	267.096	1.291	1.52305e+07	9.12411e+06	1.45192e+07	1.38638e+07	1.04893e+07	9.94656e+06	1.4936e+07	3.90758e+06	2.44324e+06	3.22514e+06	4.2992e+06	4.02506e+06	2.81781e+06	1.21465e+07	3.453e+06	0.28428	1.23371e-05	1.43171e-05
5'-O-beta-D-Glucosylpyridoxine	C14 H21 N O8	1.04053	331.126	0.916	2.54329e+06	3.21353e+06	2.46254e+06	3.00017e+06	2.96584e+06	2.96443e+06	2.62486e+06	1.67479e+06	1.94866e+06	2.10441e+06	1.63279e+06	1.83297e+06	1.98962e+06	2.87189e+06	1.86387e+06	0.649005	2.20059e-05	2.49224e-05
3-O-feruloyl-D-quinic acid	C17 H20 O9	1.46436	368.11	5.882	8.6185e+06	5.42652e+06	5.45207e+06	4.92191e+06	5.72754e+06	5.28584e+06	6.75216e+06	7.90917e+06	7.64269e+06	7.45798e+06	7.27583e+06	7.54264e+06	7.75043e+06	5.59434e+06	7.59646e+06	1.35788	2.34479e-05	2.62394e-05
2-Methyl-4-ethyl-5-propylthiazole	C9 H15 N S	1.26147	169.092	5.322	2.55457e+06	764439	804682	791607	601970	729680	695896	2.78649e+06	1.62241e+06	1.78046e+06	2.67022e+06	1.90539e+06	2.5294e+06	731379	2.21573e+06	3.02952	3.14241e-05	3.43473e-05
α-Lactose	C12 H22 O11	1.23587	342.115	0.917	3.98056e+06	5.30191e+06	5.64749e+06	5.00959e+06	5.77124e+06	5.67928e+06	6.45745e+06	3.99424e+06	4.42207e+06	4.10551e+06	4.23474e+06	4.08722e+06	4.33988e+06	5.64449e+06	4.19728e+06	0.743606	4.36969e-05	4.66762e-05
DL-Citrulline	C6 H13 N3 O3	1.56391	175.095	0.81	1.7598e+07	9.50783e+06	9.77094e+06	8.74524e+06	8.60945e+06	9.00585e+06	9.07615e+06	1.21646e+07	1.21478e+07	1.05479e+07	1.1817e+07	1.08793e+07	1.10008e+07	9.11924e+06	1.14262e+07	1.25298	4.783e-05	5.05171e-05
3-Sulfamoylalanine	C3 H8 N2 O4 S	1.94532	168.021	1.134	7.37315e+06	3.49281e+06	4.91334e+06	5.60364e+06	3.76064e+06	3.56889e+06	5.10692e+06	9.535e+06	7.16171e+06	6.84224e+06	8.03769e+06	9.07694e+06	7.59567e+06	4.40771e+06	8.04154e+06	1.82443	8.43383e-05	8.71187e-05
L-Proline	C5 H9 N O2	1.22817	115.063	0.861	2.46746e+07	8.72366e+06	8.63e+06	9.72534e+06	9.19686e+06	8.21259e+06	8.42857e+06	6.70859e+06	7.92953e+06	7.52541e+06	7.12667e+06	6.73597e+06	7.70397e+06	8.8195e+06	7.28836e+06	0.826391	0.00055394	0.000565982
Choline		1.86372	103.996	0.608	9.64774e+06	8.31571e+06	1.45272e+07	1.55565e+07	9.23381e+06	9.24084e+06	1.4051e+07	9.63343e+06	5.70356e+06	6.67639e+06	8.55248e+06	8.35397e+06	5.88909e+06	1.18209e+07	7.46815e+06	0.631778	0.0142322	0.0143853
L-(+)-Arginine	C6 H14 N4 O2	3.28489	174.111	0.759	7.69253e+07	8.00844e+07	8.21788e+07	8.2157e+07	8.37594e+07	7.77696e+07	8.64824e+07	6.42637e+07	9.14048e+07	5.85001e+07	6.61713e+07	6.62184e+07	6.22731e+07	8.20719e+07	6.81386e+07	0.83023	0.0183766	0.0183766
