# Supplementary material for: Metabolomics analysis identifies metabolites associated with systemic acquired resistance in Arabidopsis
Source: PeerJ. 2020 Sep 30;8:e10047. doi: 10.7717/peerj.10047 (PMC7532762; doi:10.7717/peerj.10047)
Supplement: Table S3 [file peerj-08-10047-s003.xlsx]

## Sheet: Sheet1
DEMs in LL-common-up				DEMs in LL-common-down
2′-Hydroxy-4,4′,6′-trimethoxychalcone				2,4-dihydroxyheptadec-16-enyl acetate
Hexadecasphinganine				2-Amino-1,3,4-octadecanetriol
trans-3-Indoleacrylic acid				(+)-α -tocopherol acetate
				6-Decylubiquinol
				8-(Methylsulfinyl)octyl isothiocyanate
				L-(+)-Aspartic acid
				5'-O-beta-D-Glucosylpyridoxine
				α-Lactose
				Choline
				L-(+)-Arginine
