# Supplementary material for: Metabolomics analysis identifies metabolites associated with systemic acquired resistance in Arabidopsis
Source: PeerJ. 2020 Sep 30;8:e10047. doi: 10.7717/peerj.10047 (PMC7532762; doi:10.7717/peerj.10047)
Supplement: Table S4 [file peerj-08-10047-s004.xlsx]

## Sheet: Sheet1
DEMs in DL-common-up				DEMs in DL-common-down
(E)-p-coumaric acid				(9S,13S)-12-Oxophytodienoic acid
6-Decylubiquinol				3-O-beta-D-galactosyl-sn-glycerol
2′-Hydroxy-4,4′,6′-trimethoxychalcone				camalexin
L-Pyroglutamic acid				O1-Cinnamoyl-3-[3,5-bis(trifluoromethyl)phenyl]prop-2-enehydroximamide
DL-Glutamine				1-{[5-Methyl-2-(trifluoromethyl)-3-furyl]carbonyl}-4-piperidinecarboxylic acid
L-(+)-Leucine				monomethyl phosphate
L-(-)-Serine				Adenine
L-(+)-Valine				Adenosine
DL-Phenylalanine				4-Oxo-4-(1H-purin-6-ylamino)butanoic acid
				Cumene
				Choline
				2-methylcitric acid
