# Supplementary material for: Metabolomics analysis identifies metabolites associated with systemic acquired resistance in Arabidopsis
Source: PeerJ. 2020 Sep 30;8:e10047. doi: 10.7717/peerj.10047 (PMC7532762; doi:10.7717/peerj.10047)
Supplement: Table S5 [file peerj-08-10047-s005.xlsx]

## Sheet: Sheet1
	Compound Discoverer 3.0 analysis
	Created with Discoverer version: 3.0.0.294
	------------------------------------------------------------------
	Processing node 1: Select Spectra
	------------------------------------------------------------------
	1. General Settings:
	Precursor Selection: Use MS1 Precursor
	- Use Isotope Pattern in Precursor Reevaluation: True
	- Store Chromatograms: False
	2. Spectrum Properties Filter:
	- Lower RT Limit: 0
	- Upper RT Limit: 0
	- First Scan: 0
	- Last Scan: 0
	Ignore Specified Scans: (not Specified)
	- Lowest Charge State: 0
	- Highest Charge State: 0
	- Min. Precursor Mass: 50 Da
	- Max. Precursor Mass: 5000 Da
	- Total Intensity Threshold: 0
	- Minimum Peak Count: 1
	3. Scan Event Filters:
	Mass Analyzer: (not Specified)
	MS Order: Any
	Activation Type: （not specified）
	- Min. Collision Energy: 0
	- Max. Collision Energy: 1000
	Scan Type: Any
	Polarity Mode: （not specified）
	4. Peak Filters:
	- S/N Threshold (FT-only): 1.5
	5. Replacements for Unrecognized Properties:
	- Unrecognized Charge Replacements: 1
	Unrecognized Mass Analyzer Replacements: ITMS
	Unrecognized MS Order Replacements: MS2
	Unrecognized Activation Type Replacements: CID
	- Unrecognized Polarity Replacements: +
	- Unrecognized MS Resolution@200 Replacements: 60000
	- Unrecognized MSn Resolution@200 Replacements: 30000
	------------------------------------------------------------------
	Processing node 2: Align Retention Times
	------------------------------------------------------------------
	1. General Settings:
	Alignment Model: Adaptive curve
	Alignment Fallback: Use Linear Model
	- Maximum Shift [min]: 2
	- Shift Reference File: True
	- Mass Tolerance: 5 ppm
	- Remove Outlier: True
	------------------------------------------------------------------
	Processing node 3: Detect Compounds
	------------------------------------------------------------------
	1. General Settings:
	- Mass Tolerance （ppm）: 5 ppm
	- Intensity Tolerance [%]: 30
	- S/N Threshold: 3
	- Min. Peak Intensity: 1000000
	- Ions:
	[2M+ACN+H]+1
	[2M+ACN+Na]+1
	[2M+FA-H]-1
	[2M+H]+1
	[2M+K]+1
	[2M+Na]+1
	[2M+NH4]+1
	[2M-H]-1
	[2M-H+HAc]-1
	[M+2H]+2
	[M+ACN+2H]+2
	[M+ACN+H]+1
	[M+ACN+Na]+1
	[M+Cl]-1
	[M+DMSO+H]+1
	[M+FA-H]-1
	[M+H]+1
	[M+H+K]+2
	[M+H+MeOH]+1
	[M+H+Na]+2
	[M+H+NH4]+2
	[M+H-H2O]+1
	[M+H-NH3]+1
	[M+K]+1
	[M+Na]+1
	[M+NH4]+1
	[M-2H]-2
	[M-2H+K]-1
	[M-H]-1
	[M-H+HAc]-1
	[M-H+TFA]-1
	[M-H-H2O]-1
	- Base Ions: [M+H]+1; [M-H]-1
	- Min. Element Counts: C H
	- Max. Element Counts: C90 H190 Br3 Cl4 K2 N10 Na2 O15 P3 S5
	2. Peak Detection:
	- Filter Peaks: True
	- Max. Peak Width [min]: 0.5
	- Remove Singlets: True
	- Min. # Scans per Peak: 5
	- Min. # Isotopes: 1
	------------------------------------------------------------------
	Processing node 4: Group Compounds
	------------------------------------------------------------------
	1. Compound Consolidation:
	- Mass Tolerance: 5 ppm
	- RT Tolerance [min]: 0.2
	2. Fragment Data Selection:
	- Preferred Ions: [M+H]+1; [M-H]-1
	------------------------------------------------------------------
	Processing node 13: Search mzCloud
	------------------------------------------------------------------
	1. Search Settings:
	- Compound Classes: All
	- Match Ion Activation Type: True
	- Match Ion Activation Energy: Match with Tolerance
	- Ion Activation Energy Tolerance: 20
	- Apply Intensity Threshold: True
	- Precursor Mass Tolerance: 10 ppm
	- FT Fragment Mass Tolerance: 10 ppm
	- IT Fragment Mass Tolerance: 0.4 Da
	- Identity Search: HighChem HighRes
	- Similarity Search: Similarity Forward
	- Library: Reference
	- Post Processing: Recalibrated
	- Match Factor Threshold: 50
	- Max. # Results: 10
	------------------------------------------------------------------
	Processing node 14: Fill Gaps
	------------------------------------------------------------------
	1. General Settings:
	- Mass Tolerance: 5 ppm
	- S/N Threshold: 1.5
	- Use Real Peak Detection: True
	------------------------------------------------------------------
	Processing node 15: Search ChemSpider
	------------------------------------------------------------------
	1. Search Settings:
	- Database(s): BioCyc; Human Metabolome Database; KEGG
	- Search Mode: By Formula or Mass
	- Mass Tolerance: 5 ppm
	- Max. # of results per compound: 100
	- Max. # of Predicted Compositions to be searched per Compound: 3
	- Result Order (for Max. # of results per compound): Order By Reference Count (DESC)
	2. Predicted Composition Annotation:
	- Check All Predicted Compositions: False
	------------------------------------------------------------------
	Processing node 8: Predict Compositions
	------------------------------------------------------------------
	1. Prediction Settings:
	- Mass Tolerance: 5 ppm
	- Min. Element Counts: C H
	- Max. Element Counts: C90 H190 Br3 Cl4 N10 O18 P3 S5
	- Min. RDBE: 0
	- Max. RDBE: 40
	- Min. H/C: 0.1
	- Max. H/C: 4
	- Max. # Candidates: 10
	- Max. # Internal Candidates: 200
	2. Pattern Matching:
	- Intensity Tolerance [%]: 30
	- Intensity Threshold [%]: 0.1
	- S/N Threshold: 3
	- Min. Spectral Fit [%]: 30
	- Min. Pattern Cov. [%]: 90
	- Use Dynamic Recalibration: True
	3. Fragments Matching:
	- Use Fragments Matching: True
	- Mass Tolerance: 5 ppm
	- S/N Threshold: 3
	------------------------------------------------------------------
	Processing node 12: Differential Analysis
	------------------------------------------------------------------
	1. General Settings:
	- Log10 Transform Values: True
	------------------------------------------------------------------
	Processing node 16: Assign Compound Annotations
	------------------------------------------------------------------
	1. General Settings:
	- Mass Tolerance: 5 ppm
	2. Data Sources:
	- Data Source #1: mzCloud Search
	- Data Source #2: Predicted Compositions
	- Data Source #3: MassList Search
	- Data Source #4: ChemSpider Search
	- Data Source #5: Metabolika Search
