# Supplementary material for: Metabolomics analysis identifies metabolites associated with systemic acquired resistance in Arabidopsis
Source: PeerJ. 2020 Sep 30;8:e10047. doi: 10.7717/peerj.10047 (PMC7532762; doi:10.7717/peerj.10047)
Supplement: Table S6 [file peerj-08-10047-s006.xlsx]

## Sheet: Sheet1
		Bacteria Number (CFU/cm2)	Log10
	Avr	53078.6	4.72492
		63694.3	4.8041
		74310	4.87105
	Vir	67232.8	4.82758
		53078.6	4.72492
		60155.7	4.77928
	CK	1.80467e+06	6.2564
		2.12314e+06	6.32698
		2.01699e+06	6.3047
