# Supplementary material for: Metabolomics analysis identifies metabolites associated with systemic acquired resistance in Arabidopsis
Source: PeerJ. 2020 Sep 30;8:e10047. doi: 10.7717/peerj.10047 (PMC7532762; doi:10.7717/peerj.10047)
Supplement: Table S7 [file peerj-08-10047-s007.xlsx]

## Sheet: Sheet1
Samples	Cq PR1	Cq actin
CK1	27.25	22.11
CK2	27.38	22.12
CK3	27.43	22.17
Vir1	25.69	22.83
Vir2	25.64	22.86
Vir3	26.15	23.1
Avr1	26.23	22.28
Avr2	26.26	22.31
Avr3	27.09	22.95
